1  
2  
3  
4  
5  
6  
7  
8  
9  
10  
11  
12  
13  
14  
15  
16  
17  
18  
19  
20  
21  
22  
23

**Utp14 interaction with the Small Subunit Processome.**

Joshua J. Black<sup>1</sup>, Zhaohui Wang<sup>1</sup>, Lisa M. Goering<sup>2</sup>, and Arlen W. Johnson<sup>1, †</sup>

1) Department of Molecular Biosciences, The University of Texas at Austin, Austin, Texas 78712

2) Department of Biological Sciences, St. Edward's University, Austin, Texas, 78704

† Corresponding author.

*Running Title:* Utp14 interaction with pre-ribosomes.

*keywords:* Utp14, exosome, SSU Processome, 40S

24 **ABSTRACT**

25           The SSU Processome (sometimes referred to as 90S) is an early stable intermediate in the  
26 small ribosomal subunit biogenesis pathway of eukaryotes. Progression of the SSU Processome to  
27 a pre-40S particle requires a large-scale compaction of the RNA and release of many biogenesis  
28 factors. The U3 snoRNA is a primary component of the SSU Processome and hybridizes to the  
29 rRNA at multiple locations to organize the structure of the SSU Processome. Thus, release of U3  
30 is prerequisite for the transition to pre-40S. Our lab proposed that the RNA helicase Dhr1 plays a  
31 crucial role in the transition by unwinding U3 and that this activity is controlled by the SSU  
32 Processome protein Utp14. How Utp14 times the activation of Dhr1 is an open question. Despite  
33 being highly conserved, Utp14 contains no recognizable domains, and how Utp14 interacts with  
34 the SSU Processome is not well characterized. Here, we used UV crosslinking and analysis of  
35 cDNA and yeast two-hybrid interaction to characterize how Utp14 interacts with the pre-ribosome.  
36 Moreover, proteomic analysis of SSU particles lacking Utp14 revealed that Utp14 is needed for  
37 efficient recruitment of the RNA exosome. Our analysis positions Utp14 to be uniquely poised to  
38 communicate the status of assembly of the SSU Processome to Dhr1 and possibly the exosome as  
39 well.

40

## 41 INTRODUCTION

42 Ribosomes are the complex and dynamic molecular machines that decode genetic  
43 information into protein. In *Saccharomyces cerevisiae*, the ribosomal large subunit (LSU or 60S)  
44 is composed of three ribosomal RNA (rRNA) molecules (25S, 5.8S, 5S) and 46 ribosomal proteins  
45 (r-proteins), and the small subunit (SSU or 40S) consists of the 18S rRNA and 33 r-proteins (Ben-  
46 Shem et al. 2011). Ribosome synthesis begins in the nucleolus with co-transcriptional recruitment  
47 of assembly factors to the polycistronic 35S transcript. The 35S rRNA undergoes extensive  
48 modification and processing, coordinated with RNA folding and protein assembly, to generate the  
49 pre-40S and pre-60S particles, which are subsequently exported to the cytoplasm where the final  
50 steps of maturation occur (for recent reviews see (Kressler et al. 2017; Peña et al. 2017; Sloan et  
51 al. 2016)).

52 An early stable intermediate of 40S assembly is the SSU Processome, a large complex of  
53 ~6MDa containing the 5'-portion of the 35S rRNA transcript, the 5'-external transcribed spacer  
54 (5'-ETS), 18S and a portion of the internal transcribed spacer 1 (ITS1) (Kressler et al. 2017). The  
55 SSU processome also contains the U3 snoRNA and approximately 70 assembly factors (Chaker-  
56 Margot et al. 2015; Zhang et al. 2016). Although the SSU processome is sometimes referred to as  
57 the 90S pre-ribosomal complex, we will use the term SSU processome to avoid confusion with  
58 related particles that contain intact 35S rRNA. Recent high-resolution cryo-electron microscopy  
59 reconstructions of the SSU Processome from *S. cerevisiae* and the thermophilic fungus  
60 *Chaetomium thermophilum* reveal a highly splayed-open structure of the rRNA (Kornprobst et al.  
61 2016; Chaker-Margot et al. 2017; Sun et al. 2017; Barandun et al. 2017; Cheng et al. 2017). The  
62 SSU Processome may represent a metastable intermediate of assembly, as particles with similar  
63 structure and composition have been purified from cells under various conditions including

64 stationary phase in which ribosome biogenesis is largely repressed (Chaker-Margot et al. 2017;  
65 Barandun et al. 2017).

66 Progression of the SSU Processome to the pre-40S particle requires endonucleolytic  
67 cleavages at sites A<sub>0</sub> and A<sub>1</sub> within the 5'-ETS to generate the mature 5'-end of 18S and cleavage  
68 at site A<sub>2</sub> within ITS1 (Kressler et al. 2017). This transition results in the release of most SSU  
69 Processome factors, and concomitant large-scale rearrangements of the RNA as the splayed open  
70 structure collapses into the more compact structure of the small subunit (Johnson et al. 2017; Heuer  
71 et al. 2017). What triggers the transition of the SSU Processome to a pre-40S is not yet known.

72 A primary feature of the SSU Processome is the U3 snoRNA (*SNR17A/B*) which hybridizes  
73 to multiple regions of the 5'-ETS as well as 18S rRNA to provide a scaffold for the initial folding  
74 of the pre-ribosomal RNA and assembly of the domains of the small subunit (Dragon et al. 2002;  
75 Sun et al. 2017; Barandun et al. 2017; Cheng et al. 2017). Importantly, U3 hybridizes to residues  
76 in the 5'-end of 18S that are involved in intramolecular base-pairing required to form the central  
77 pseudoknot, a critical RNA element that coordinates all domains of the small subunit (Henras et  
78 al. 2008). Consequently, U3 must be released to allow assembly of the central pseudoknot, and it  
79 is likely that the release of U3 is a principal driver of the RNA rearrangements that promote the  
80 transition from the SSU processome to the pre-40S particle. We previously provided evidence that  
81 the release of U3 is driven by the DEAH-box RNA helicase Dhr1 (Ecm16) (Sardana et al. 2015)  
82 whose stable association and subsequent activation depends upon direct interactions with the SSU  
83 processome factor Utp14 (Zhu et al. 2016). However, how the timing of Dhr1 activation by Utp14  
84 is controlled is not known. Utp14 joins the SSU Processome at a late stage of assembly, after the  
85 majority of the 3'-minor domain has been transcribed (Chaker-Margot et al. 2015; Zhang et al.  
86 2016). Unlike the majority of SSU Processome factors, Utp14 remains associated with 20S rRNA

87 (Sardana et al. 2013) suggesting it remains on the pre-ribosome during the transition from SSU  
88 Processome to pre-40S particle, however it is not present on cytoplasmic particles (Johnson et al.  
89 2017; Heuer et al. 2017). Utp14 is a highly-conserved protein found throughout eukaryotes but  
90 contains no recognizable domains, and its interaction with the pre-ribosome has only recently  
91 begun to be revealed (Sardana et al. 2013; Zhu et al. 2016; Barandun et al. 2017; Cheng et al.  
92 2017).

93 We sought to further characterize the interaction of Utp14 with the pre-ribosome to  
94 understand how it regulates Dhr1 activity in the context of the SSU Processome. Here, we used  
95 UV Crosslinking and Analysis of cDNA (CRAC) to identify the RNA binding sites of Utp14 and  
96 yeast 2-hybrid analysis to map domain interactions with assembly factors and small subunit r-  
97 proteins. In addition, we examined the protein and RNA composition of particles arrested with  
98 several Utp14 mutants. Our work is consistent with and extends recent structural and genetic  
99 analyses of the SSU Processome.

100

## 101 RESULTS

102 **Utp14 binds multiple RNA elements in the SSU Processome.** To determine the RNA binding  
103 sites of Utp14 we used a modified UV cross-linking and analysis of cDNA (CRAC) protocol  
104 (Granneman et al. 2009). UV irradiation induces covalent cross-links between amino acids and  
105 neighboring nucleic acids allowing for nucleotide-resolution of RNA binding sites of proteins. The  
106 C-terminal His6-tobacco etch virus (TEV) protease recognition site-protein A (HTP) tag was  
107 integrated into the genomic locus of *UTP14*. The HTP tag had no apparent effect on growth (data  
108 not shown). Cells were subjected to UV irradiation and RNAs crosslinked to Utp14-HTP were  
109 first affinity-purified via the protein A tag under native conditions followed by RNase treatment

110 and a second step purification via its His6 tag under denaturing conditions. To verify that RNAs  
111 were crosslinked to Utp14, co-purifying RNAs were radio-labeled with  $^{32}\text{P}$ , separated by SDS-  
112 PAGE and autoradiographed (Figure 1A). The HTP-tagged sample contained a high molecular  
113 weight radiolabeled band that was not present in the untagged control. This species was excised,  
114 crosslinked RNAs were released from Utp14 by proteinase K digestion, and the crosslinked RNAs  
115 were sequenced following library preparation (see Materials and Methods). Whereas the CRAC  
116 protocol involves ligation of oligonucleotides to both ends of the RNA followed by reverse  
117 transcription and amplification, we ligated a single oligonucleotide to the 3'-ends of the RNAs,  
118 followed by reverse transcription, circularization of the resulting product and amplification. This  
119 strategy results in a characteristic drop-off of the reverse transcriptase on the 5'-end of the cDNA  
120 product where an amino acid was crosslinked to the RNA substrate.

121 Utp14-HTP crosslinked RNAs were enriched for rRNA and snoRNAs compared to the  
122 mock in both replicates (Figure 1B). Despite the lower level of rRNA enrichment in the second  
123 replicate, both datasets showed specific hits within rRNA, mapping primarily to pre-18S rRNA  
124 within 35S rRNA (Figure 1C and 1D; bottom). Utp14 crosslinked to multiple RNA elements  
125 within the pre-18S rRNA (Figures 1C and 1D; top). The highest read densities corresponded to  
126 nucleotides spanning helix 26es7 (hereafter referred to as helix 26) and across the 3'-end of helix  
127 45 through the D-site which generates the 3'-end of 18S after cleavage in the cytoplasm. Consistent  
128 Utp14-specific reads were also obtained at helices 18 and 36/37, while read densities across 21es6d  
129 (hereafter referred to as ES6) were reproducible but more variable between the two data sets. A  
130 small subset of reads aligned to nucleotides surrounding ~480-600 of the 5'-ETS and the 5'-end  
131 of 18S. Mapping these binding sites to a current SSU Processome structure (Figure 1E) showed  
132 that helix 26 and the D-site are approximately 60 Å apart from one another, while helix 18 is

133 tucked within the core of the structure, and the 5'-ETS sites are on the exterior of the particle  
134 approximately 70 Å away from helix 26 and approximately 140 Å away from the D-site. Helices  
135 21es6d, 36, and 37 of the 18S rRNA were unresolved in this structure. These results imply that  
136 Utp14 traverses a large area of the SSU Processome. It is also possible that different sites are  
137 contacted at different stages of 40S assembly as Utp14 associates with 90S and pre-40S (Zhu et  
138 al. 2016).

139 Our result that Utp14 crosslinked across the A<sub>1</sub> site and 5'-ETS is consistent with recent  
140 structures of the SSU Processome in which limited regions of Utp14 were resolved (Barandun et  
141 al. 2017). That work showed that residues 845-849 of Utp14 contact the A<sub>1</sub> site and residues 828-  
142 834 of Utp14 contact several nucleotides of helix V of the 5'-ETS, while residues 317-408 and  
143 876-896 of Utp14 wrap around helices VII and VIII of the 5'-ETS. A similar interaction of Utp14  
144 with the 5'-ETS is also observed in the SSU Processome from the thermophilic fungus  
145 *Chaetomium thermophilum* (Cheng et al. 2017).

146 Since Utp14-HTP also enriched for snoRNAs (Figure 1B), we analyzed the percentage of  
147 reads aligning to each snoRNA relative to the total sense aligned reads (Supplemental File 1). U3  
148 snoRNA (*SNR17A/B*) was present in both datasets with the majority of the reads mapping to  
149 nucleotides ~20-60 of U3 (Figure 1F). Interestingly, this binding site overlaps the binding site of  
150 Dhr1 on U3 that we previously identified (Figure 1E) (Sardana et al. 2015). Although the negative  
151 control from data set 2 also contained reads to this region of U3, a recent SSU Processome structure  
152 confirmed that Utp14 appears to contact U24 and G37 of U3 (Barandun et al. 2017) which are  
153 within the range protected by Utp14 in our crosslinking analysis (Figure 1F). Thus, in addition to  
154 its rRNA contacts, we conclude that Utp14 also directly interacts with the U3 snoRNA. Moreover,  
155 a small set of reads aligned to snR30. It was previously reported that snR30 hybridizes to helix 26,

156 a major crosslink site of Utp14, before its release by Rok1 (Martin et al. 2014). Thus, the reads  
157 mapping to snR30 may reflect a transient interaction between Utp14 and snR30. When taken  
158 together, these data demonstrate that Utp14 is an RNA binding protein that contacts multiple RNA  
159 elements within the SSU Processome with its primary sites being helix 26 and the D-site.

160

161 **The N-terminus of Utp14 interacts with proteins that bind Helix 26.** We first attempted to  
162 support our crosslinking result that Utp14 binds to helix 26 using the yeast three-hybrid system,  
163 but we were unable to detect a specific interaction (data not shown). As an alternative approach,  
164 we reasoned that Utp14 may interact with proteins in the vicinity of its RNA binding sites. Utp22,  
165 Rrp7, and Rps1 (eS1) are within close proximity of helix 26 in recently solved structures of the  
166 SSU Processome (Sun et al. 2017; Cheng et al. 2017) (Figure 2A). Utp22 and Rrp7 are components  
167 of the UTPC sub-complex that are recruited to the pre-ribosome after synthesis of the Central  
168 domain of 18S (Chaker-Margot et al. 2015; Zhang et al. 2016; Lin et al. 2013). Additionally, an  
169 interaction between Utp22 and Utp14 was recently reported in two large-scale yeast two hybrid  
170 (Y2H) analyses of ribosome biogenesis factors (Baßler et al. 2016; Vincent et al. 2018). Rps1 is  
171 an r-protein needed upstream of processing at A<sub>0</sub>, A<sub>1</sub>, A<sub>2</sub>, and D (Ferreira-Cerca et al. 2005), and  
172 remains bound to helix 26 in the mature 40S (Ben-Shem et al. 2011). The TPR domain repeats of  
173 Rrp5 also bind near helix 26 the TPR domain repeats of Rrp5 (Sun et al. 2017), and an interaction  
174 between *C. thermophilum* (*ct*) Utp14 and Rrp5 was recently reported (Baßler et al. 2016).

175 We used Y2H analysis to test direct interactions between Utp14 and these proteins. Indeed,  
176 full length Utp14 interacted with Utp22 and Rps1 as indicated by growth on reporter media  
177 containing 3-amino-1,2,4-triazole (3AT), a competitive inhibitor of the *HIS3* gene product that  
178 increases the stringency of the assay. (Figure 2B; see columns 2 and 4). Utp14 is 899 amino acids



179 in length, and much of the protein is not resolved in recent SSU Processome structures. To  
180 determine which region of Utp14 interacts with these proteins, we assayed a series of N- and C-  
181 terminal truncations of Utp14 for interaction. All C-terminal truncations retained interaction with  
182 Utp22 and Rps1. In contrast, all N-terminal deletions of Utp14 that were tested lost interaction  
183 with Utp22 and Rps1. Thus, the N-terminal portion (residues 1-265) of Utp14 was both necessary  
184 and sufficient for interaction with Utp22 and Rps1. We also noted that the interaction between  
185 Utp14 and Rps1 was enhanced by deletion of aa 565 to 899 (Figure 2B; *cf.* columns 4 and 5). The  
186 longer fragments of the protein may fold in a way that inhibits their interaction with Rps1 outside  
187 the context of the SSU Processome. We did not detect interactions between Utp14 and Rrp5 or  
188 Rrp7 using the *S. cerevisiae* genes (data not shown). Taken together, the Y2H interaction data  
189 between Utp22 and Rps1 with Utp14 and the UV crosslinking of Utp14 to helix 26 suggests that  
190 the N-terminus of Utp14 (residues 1-265) is responsible for its interaction with helix 26.

191

192 **A C-terminal portion of Utp14 interacts with Pno1.** To support the Utp14 crosslinks mapping  
193 to the D-site, we also first tested the interaction between Utp14 and the D-site by yeast three-hybrid  
194 but were unable to detect an interaction (data not shown). Consequently, we again considered that  
195 Utp14 may interact with proteins in the vicinity of the D-site. Recent structures of the SSU  
196 Processome show that Pno1 (Dim2) binds the D-site (Barandun et al. 2017; Sun et al. 2017) (Figure  
197 3A). Pno1 is an essential KH-like domain protein that stably associates with the pre-ribosome once  
198 the majority of the 3'-minor rRNA domain of 18S is synthesized (Zhang et al. 2016; Chaker-  
199 Margot et al. 2015) and remains on pre-40S particles that enter the cytoplasm (Vanrobays et al.  
200 2004; Johnson et al. 2017; Heuer et al. 2017). Pno1 is thought to recruit the dimethyltransferase  
201 Dim1, that methylates the 3'-end of the 18S rRNA (Vanrobays et al. 2004). An interaction between

202 *ctUtp14* and *ctPno1* was also reported in a large-scale screen for interactions among biogenesis  
203 factors (Baßler et al. 2016). To define the domain of Utp14 that interacts with Pno1, we again used  
204 Y2H analysis to assay interactions between the various Utp14 fragments and Pno1 (Figure 3B).  
205 Due to the proximity of the D site to helix 26, we initially expected Pno1 to interact with the N-  
206 terminus of Utp14. However, we found that C-terminal truncations abolished or weakened the  
207 interaction of Utp14 with Pno1, while N-terminal truncations maintained the interaction (Figure  
208 2C; column 3). Furthermore, the Utp14 fragment containing residues 1-813 maintains an  
209 interaction with Pno1 on 3mM 3AT (Figure 3B; column 2) suggesting that residues 707-813 of  
210 Utp14 are critical for the interaction with Pno1. While this manuscript was in preparation an  
211 interaction between *ctUtp14* and the KH-like domain of *ctPno1* was reported (Sturm et al. 2017).  
212 Taken together with that study, we infer that Utp14 binds to or near the D-site, and that the binding  
213 interface required for this interaction is between the KH-like domain of Pno1 and residues 707-  
214 813 of Utp14.

215

216 **Protein composition of wild-type and mutant Utp14 particles.** Since Utp14 interacts with  
217 multiple regions of the SSU Processome, we subsequently sought to further understand how the  
218 presence of Utp14 affects the proteomic composition of preribosomal particles. We previously  
219 showed that Utp14 interacts with and activates the RNA helicase Dhr1 (Zhu et al. 2016). Both  
220 proteins are recruited to the pre-ribosome at a similar stage of maturation, (Chaker-Margot et al.  
221 2015; Zhang et al. 2016) and thus are expected to stall progression of the SSU Processome at a  
222 similar point. To ask if Utp14 is required for the recruitment of additional proteins, we compared  
223 the protein composition of particles depleted of Utp14 or Dhr1. We isolated pre-ribosomal  
224 particles from cultures expressing C-terminally tagged tandem affinity purification (TAP) Enp1

225 after the repression of transcription of *UTP14* or *DHR1* and depletion of the respective proteins.  
226 Enp1 is an ideal bait for this assay as it binds prior to Utp14 association with pre-ribosomes (Zhang  
227 et al. 2016) and remains associated with pre-40S particles until the cytoplasm (Johnson et al. 2017),  
228 after Utp14 has been released. After affinity-purification and TEV elution, we sedimented samples  
229 through sucrose cushions to separate pre-ribosomal particles from extraribosomal bait and other  
230 co-purifying extraribosomal proteins. Following mass spectrometry, we generated relative spectral  
231 abundance factor (RSAF) values as described previously (Sardana et al. 2015). Figure 4A shows  
232 a heat map of RSAF values for 40S biogenesis factors that co-purified with the Enp1-TAP  
233 particles, normalized to the mean RSAF value for the UTP-B sub-complex of the sample as done  
234 previously (Zhang et al. 2016). This semi-quantitative analysis reflected the relative stoichiometry  
235 of proteins within the purified particles, validated by the 2-fold abundance of factors known to be  
236 present as dimers (Emg1 and Kre33) or in a 2:1 stoichiometry (Nop1 and Snu13) (Sun et al. 2017;  
237 Barandun et al. 2017; Cheng et al. 2017).

238 The overall compositions of the Utp14- and Dhr1-depleted particles were similar (Figure  
239 4A and Supplemental File 2), however, we note several differences amongst the particles after  
240 applying the criteria that a given factor in the truncated Utp14 particles showed a log<sub>2</sub>-fold change  
241 of  $\pm 1$  or more relative to the Dhr1-depleted particles and at least one of the samples contained at  
242 least 5 spectral counts. As expected the Utp14- and Dhr1-depleted particles showed significantly  
243 reduced signal for Utp14 and Dhr1, respectively. The most notable difference between these two  
244 particles was a strong reduction of the RNA exosome in the Utp14-depleted particle relative to the  
245 Dhr1-depleted particle suggesting that Utp14 may have a role in the recruitment of the exosome.

246 As a complementary approach, we also tested the significance of the interactions of the N-  
247 and C-terminal regions of Utp14 using two truncation mutants deleted of residues 1-265 (Utp14-

248  $\Delta$ N) or residues 707-899 (Utp14- $\Delta$ C). These Utp14 mutants are expected to lose interactions with  
249 its binding sites at helix 26 and the D-site, respectively (Figures 2 and 3). Neither of these  
250 truncation mutants was able to complement the loss of Utp14 (Figure 4B). To rule out the  
251 possibility that these mutants were non-functional because they failed to express well or engage  
252 with pre-ribosomes, we assayed their sedimentation in sucrose gradients. Both the N- and C-  
253 terminally truncated proteins showed a population of protein that sedimented in the 40S to 80S  
254 region of the gradient, similar to wild-type, suggesting that both proteins enter into pre-ribosomal  
255 particles (data not shown). However, less Utp14- $\Delta$ C sedimented in these deeper gradient fractions  
256 than Utp14- $\Delta$ N did, suggesting that the association of Utp14- $\Delta$ C with pre-ribosomes is reduced.

257         To ask if there were any changes in the protein composition of the Utp14 mutant particles  
258 compared to wild-type, we affinity-purified particles via C-terminal TAP tags. The particles  
259 affinity-purified by wild-type or truncated Utp14 displayed overall similar protein compositions  
260 with some differences (Figure 4C and Supplemental File 2). Most notably, the full-length Utp14  
261 particles contained the exosome, while it was nearly absent from the Utp14- $\Delta$ N, and significantly  
262 reduced in the Utp14- $\Delta$ C particle further suggesting that Utp14 has a role in the efficient  
263 recruitment of the exosome. Moreover, the Utp14- $\Delta$ C particles were enriched for Nob1 and  
264 slightly enriched for Dim1 and its interacting partner Pno1. Conversely, the Utp14- $\Delta$ N particles  
265 completely lacked Dim1 but contained wild-type levels both of Nob1 and Pno1. In general, the  
266 Utp14- $\Delta$ C particles contained a greater abundance of pre-40S factors than the full-length Utp14 or  
267 Utp14- $\Delta$ N particles. These observations support the notion that the Utp14- $\Delta$ N particle is stalled in  
268 the SSU Processome assembly pathway upstream of the Utp14- $\Delta$ C particle. Furthermore, both  
269 mutant particles displayed overall reduced signal relative to the full length Utp14 particles for the  
270 RNA helicases including Dbp8 and its cofactor Esf2 and overall decrease in 3' minor domain

271 factors Utp25 and Sgd1 suggesting that the Utp14 mutants have an effect on the recruitment of  
272 these factors. Together, the results of both analyses suggest an unexpected role for Utp14 in the  
273 recruitment of the exosome to the SSU Processome.

274

275 **Utp14- $\Delta$ C co-purifies with an extraribosomal sub-complex containing Rps7 and Rps22.** Our  
276 purification strategy for pre-ribosomal particles, involving sedimentation of particles through a  
277 sucrose cushion, separated bait associated with pre-ribosomes from extraribosomal bait and other  
278 non-ribosome-bound proteins. We noted two lower molecular weight species present in the Utp14-  
279  $\Delta$ C-TAP extraribosomal fraction (Figure 5A; lane 6). Mass spectrometry identified the ~ 20 kDa  
280 species to be Rps7 (eS7) and the ~10 kDa species to be Rps22 (uS8). Rps7 and Rps22 interact  
281 directly with one another in the context of nascent and mature ribosomes (Figure 5B) (Ben-Shem  
282 et al. 2011; Sun et al. 2017; Barandun et al. 2017; Cheng et al. 2017) and we recapitulated this  
283 interaction by Y2H (Figure 5C). We then used the Y2H system to ask if Utp14 interacted with  
284 either Rps7 or Rps22. We found that the N-terminus of Utp14 (residues 1-265) was both necessary  
285 and sufficient for the interaction between Utp14 and Rps7 (Figure 5D). We did not, however,  
286 detect an interaction between Utp14 and Rps22 (data not shown). These results suggest that Rps7  
287 and Rps22 initially bind to the SSU Processome in an unstable fashion and require full length  
288 Utp14 to stabilize their interaction with the SSU Processome. We considered the possibility that  
289 Rps7 or Rps22 is needed for the recruitment of Utp14 to the SSU Processome but did not observe  
290 any decreased association of Utp14 upon depletion of either Rps7 or Rps77 (data not shown).

291

292 **RNA composition of wild-type and mutant Utp14 particles.** We next asked whether the Utp14  
293 mutant particles also differed in their content of rRNA processing intermediates. RNA was

294 prepared from TAP-tagged wild-type and Utp14 mutant particles and analyzed by northern  
295 blotting to detect rRNA processing intermediates (Figure 6A). Wild-type and truncated mutant  
296 Utp14 associated with distinct rRNA processing intermediates consistent with their ability to bind  
297 pre-ribosomal particles (Figure 6B). Particles pulled down with full-length Utp14 contained 35S,  
298 33S, 23S, 22/21S, and 20S rRNA intermediates (Figure 6B; lane 1), reflecting its association with  
299 the SSU processome and pre-40S at multiple stages of pre-rRNA processing. Utp14- $\Delta$ N associated  
300 with 35S, 33S, 23S, and 22/21S, but not 20S (Figure 6B; lane 2, D-A<sub>2</sub> panel). The Utp14- $\Delta$ N  
301 particle was also enriched for degradation intermediates of 23S rRNA (asterisks in Fig 6B),  
302 suggesting that the associated RNA was subjected to 3'-degradation by the exosome. Similar to  
303 full length Utp14, the Utp14- $\Delta$ C mutant associated with 35S, 33S, 23S, 22/21S, and 20S (Figure  
304 6B; lane 3), but co-purified with less rRNA overall, consistent with its decreased association with  
305 the pre-ribosome (Figure 5A). The lack of 20S rRNA in the Utp14- $\Delta$ N particle, indicates that this  
306 particle is stalled earlier in the processing pathway, at A<sub>2</sub> cleavage, compared to the Utp14- $\Delta$ C  
307 mutant particle. This result agrees with the proteomic profiles described above, in which the  
308 Utp14- $\Delta$ N contained overall less pre-40S factors than the Utp14- $\Delta$ C (Figure 4A).

309 The exosome is required for the exonucleolytic degradation of the 5'-A<sub>0</sub> fragment (Thoms  
310 et al. 2015). Because the mutant Utp14 particles were deficient for the exosome (Figure 4A), we  
311 asked if the 5'-A<sub>0</sub> fragment was enriched in the Utp14 mutant particles. For comparison, we  
312 depleted the exosome-associated helicase Mtr4 (Figure 6B; lane 4) to inhibit degradation of the  
313 5'-A<sub>0</sub> fragment (Thoms et al. 2015). The Mtr4-depleted sample was highly enriched for the 5'-A<sub>0</sub>  
314 fragment, as expected. However, the Utp14-depleted particle did not show a similar enrichment  
315 for this fragment despite being severely depleted for the exosome, suggesting that the apparent

316 lack of exosome recruitment in the Utp14 mutant particles does not result in a noticeable defect in  
317 degradation of 5'-A<sub>0</sub> in these particles.

318 As an alternative method to ask how the Utp14 mutants affected rRNA processing, we  
319 carried out a second set of purifications using Enp1-TAP from cells expressing wild-type Utp14,  
320 the N- and C-terminal truncation mutants or depleted of Utp14. For comparison, we also affinity  
321 purified Enp1-TAP from Dhr1-depleted cells. Northern blot analysis of the RNAs that co-purified  
322 with Enp1-TAP from wild-type cells revealed that Enp1 primarily associated with 20S but low  
323 levels of 33S, 23S and 22S/21S were also observed (Figure 6C; lane 1). This result is consistent  
324 with the late entry of Enp1 into the SSU Processome and its continued association with pre-40S  
325 (Chaker-Margot et al. 2015; Zhang et al. 2016; Johnson et al. 2017; Sun et al. 2017). In the absence  
326 of Utp14, Enp1-TAP associated primarily with 23S (Figure 6C; lane 2) with a low level of 22S/21S  
327 also detected. Interestingly, in the absence of Utp14, Enp1 also associated with low levels of 35S  
328 but not 33S as observed in wild-type cells. Apparently, in the absence of Utp14, cleavage at A<sub>0</sub> is  
329 blocked and Enp1 is recruited to 35S instead of 33S. The strong accumulation of 23S suggests that  
330 Utp14 is also required for cleavages at A<sub>1</sub> and A<sub>2</sub>. The low level of 22S/21S may be due to  
331 continued processing in the presence of residual Utp14 or indicate that Utp14 is not absolutely  
332 required for A<sub>1</sub> and A<sub>2</sub> cleavage.

333 The two Utp14 truncation mutants resulted in Enp1 association with RNAs reflecting  
334 processing that was intermediate between that of wild-type and Utp14-depleted cells. In the  
335 presence of Utp14-ΔN, Enp1 associated with both 35S and 33S RNAs and instead of the strong  
336 accumulation of 23S in Utp14-depleted cells or 20S in wild-type cells, signal was roughly equally  
337 distributed among 23S, 22/21S, and 20S species (Figure 6C; lane 3). In contrast, in the presence  
338 of Utp14-ΔC Enp1 associated with both 35S and 33S but the levels of 23S and 22S/21S were

339 reduced with 20S predominating (Figure 6C; lane 4). The presence of 20S in the Enp1-purified  
340 particle from Utp14- $\Delta$ N-expressing cells was surprising given that Utp14- $\Delta$ N itself does not co-  
341 purify with 20S (Fig. 6B; lane 2). This may indicate that while Utp14- $\Delta$ N associates with pre-  
342 ribosomes that have not yet been cleaved at A<sub>2</sub>, it may not stably associate with particles after A<sub>2</sub>  
343 cleavage. These results indicate that the N- and C-terminally truncated proteins support rRNA  
344 processing that is intermediate between that of wild-type and Utp14-depleted cells, with the Utp14-  
345  $\Delta$ C mutant supporting more extensive processing. By comparison, in the absence of Dhr1 Enp1  
346 co-purified with 33S, 22/21S and 20S but not 35S or 23S (Figure 6C; lane 5), indicating that Utp14  
347 is required upstream of Dhr1 for cleavages at A<sub>0</sub> and A<sub>1</sub>. The accumulation of 22/21S rRNA from  
348 Utp14- $\Delta$ N-expressing cells was similar to the processing defects of the Dhr1-depleted particles,  
349 suggesting the Utp14- $\Delta$ N is defective in its ability to stimulate Dhr1 efficiently (Figure 6C; *cf.*  
350 lanes 3 and 5).

351

## 352 **DISCUSSION**

353 We previously identified Dhr1 as the RNA helicase that unwinds U3 from the pre-rRNA  
354 (Sardana et al. 2015). Considering the central role that U3 hybridization to the pre-rRNA plays in  
355 organizing the structure of the SSU Processome, its unwinding by Dhr1 likely contributes to  
356 disassembly of the SSU Processome in the transition to the pre-40S particle. What times the  
357 activation of Dhr1, to unwind U3 at the appropriate stage of SSU Processome assembly remains  
358 an open question. We identified Utp14 as a Dhr1-interacting partner that stimulates the unwinding  
359 activity of Dhr1 (Zhu et al. 2016), raising the possibility that Utp14 is involved in timing Dhr1  
360 activity *in vivo*. In an effort to understand how Utp14 might coordinate SSU Processome assembly  
361 with stimulation of Dhr1 activity, we mapped the interaction of Utp14 with the pre-ribosome



362 identifying that Utp14 binds to multiple regions within the pre-18S rRNA, including 5' and 3'  
363 elements. While this manuscript was in preparation, the partial structure of Utp14 in the SSU  
364 Processome was solved (Barandun et al. 2017; Cheng et al. 2017). Our analysis extends the  
365 structural analysis by uncovering how unresolved elements of Utp14 interact with the pre-  
366 ribosome. Moreover, our analysis suggests a model in which Utp14 communicates between the  
367 5'- and 3'-ends of pre-18S rRNA to monitor the status of the SSU Processome (see below). Our  
368 proteomic characterization of pre-ribosomal particles depleted of Utp14 revealed a specific loss of  
369 the exosome, responsible for the exonucleolytic degradation of the 5'-ETS. These results could  
370 suggest an unanticipated role for Utp14 in the recruitment of this complex.

371

372 **Does Utp14 communicate between the 3'- and 5'-ends of 18S rRNA?** Our protein-RNA  
373 crosslinking analysis identified a major binding site for Utp14 across the D-site of pre-rRNA, the  
374 cleavage site that generates the mature 3'-end of 18S. We also identified Utp14 binding sites within  
375 the 5'-ETS and across the A<sub>1</sub> site, which generates the mature 5'-end of 18S (Figure 1 C, D). To  
376 complement our UV crosslinking approach, which did not allow us to determine the domains of  
377 Utp14 that were responsible for these RNA interactions, we used yeast-two hybrid analysis to  
378 identify interactions between domains of Utp14 and proteins that bound in the vicinity of the RNA  
379 binding sites, thereby approximating the domains of Utp14 responsible for the major RNA  
380 interactions at helix 26 and the D site. In addition, several  $\alpha$ -helices of Utp14 were assigned in  
381 recent cryo-EM structures of the SSU Processome (Barandun et al. 2017; Cheng et al. 2017),  
382 corroborating the interactions of Utp14 that we identified with the 5'-ETS and Site A<sub>1</sub> and  
383 identifying the residues of Utp14 that are likely involved in these interactions. Because Utp14  
384 associates with 35S pre-rRNA in the SSU Processome as well as 20S pre-rRNA in the pre-40S

385 (Zhu et al. 2016), the RNA interactions we identified could reflect interactions at various stages of  
386 40S biogenesis. However, the ability to map interactions to the SSU Processome suggests that the  
387 interactions we detected are predominantly in the context of the intact SSU Processome. These  
388 results are summarized in Figure 7, which combines our RNA crosslinking and protein interaction  
389 data with SSU Processome structure. We see that a C-terminal region of Utp14, between aa 707  
390 and 813, interacts with the D site and Pno1 whereas the A<sub>1</sub> site and 5'-ETS is recognized by a  
391 complex interaction of the extreme C-terminus of Utp14 and overlapping helices that wrap around  
392 the 5'-ETS. Connecting these two regions is a long unresolved loop that contains the Dhr1 binding  
393 site, from aa 565-813. Thus, Utp14 is uniquely positioned to connect the 5'- and 3'-ends of the  
394 18S rRNA, tethering Dhr1 via the intervening loop. A tempting model is that Utp14 actively  
395 monitors the status of transcription and assembly of the 3'-end of the small subunit RNA, to signal  
396 maturation of SSU Processome. Such a model affords a mechanism for how Utp14 could time the  
397 of activation the helicase activity of Dhr1 to unwind U3. However, both Utp14 and Dhr1 are  
398 present in the mature SSU Processome, with U3 remaining bound to rRNA, indicating that  
399 additional signals are required to trigger Dhr1 unwinding.

400

401 **What is the relationship between Utp14 and the nuclear RNA exosome?** Our proteomic  
402 analysis of Utp14 mutant particles suggests that Utp14 is needed for the efficient recruitment of  
403 the exosome to the SSU Processome. This conclusion is based on our observation that the exosome  
404 was severely reduced in Utp14-depleted and mutant Utp14 particles compared with Utp14 replete  
405 or Dhr1-depleted particles. This difference in exosome abundance was despite the overall  
406 similarity in protein composition among these particles and suggests that either Utp14 is directly

407 involved in recruiting the exosome or Utp14 is required for structural rearrangements of the SSU  
408 Processome that promote exosome recruitment.

409         It was previously shown that Utp18 recruits the exosome to the 5'-ETS through direct  
410 interaction between its AIM domain and the Arch domain of Mtr4, the RNA helicase for the  
411 nuclear exosome (Thoms et al. 2015). Utp18 is a component of the UTP-B sub complex and binds  
412 relatively early to the assembling nascent SSU Processome, after the 5'-ETS has been transcribed  
413 (Chaker-Margot et al. 2015; Zhang et al. 2016), but it is expected that the exosome is not recruited  
414 until the SSU Processome is fully assembled. To rationalize Utp18 recruitment significantly  
415 preceding exosome recruitment, it was proposed that accessibility of the AIM domain to Mtr4 is  
416 regulated during assembly of the SSU Processome (Thoms et al. 2015). It is possible that the  
417 recruitment of Utp14 regulates accessibility of the AIM domain. However, based on current  
418 structures in which limited portions of both Utp14 and Utp18 have been resolved, we prefer the  
419 model in which Utp14 is required together with Utp18 for stable recruitment of Mtr4. In those  
420 structures, residues near the N-terminus and the very C-terminus of Utp14 interact with each other,  
421 in the vicinity of the A<sub>1</sub> site, the expected position of the A<sub>0</sub> site and approaching Utp18. We note  
422 that the exosome was depleted from particles lacking Utp14 in its entirety or lacking either  
423 terminus. We suggest that interaction of the two termini is critical for establishing a structure that  
424 stabilizes the exosome, either through direct interaction or indirectly through the structure of the  
425 assembled SSU Processome. Such influence on the recruitment of the exosome would be  
426 consistent with the idea that Utp14 acts to signal between the 3'- and 5'-ends of the SSU  
427 Processome to recruit the exosome only after the SSU Processome has been deemed complete  
428 (Figure 7B).

429

430 **MATERIALS AND METHODS**

431 **Strains, plasmids, and growth media.** All *S. cerevisiae* strains and sources are listed in Table 1.  
432 AJY4051 was generated by genomic integration of the HIS6-tobacco etch virus (TEV)-protein A  
433 (HTP) tag (Granneman et al. 2009) into BY4741. AJY4257 and AJY4258 were generated by  
434 genomic integration of *ENP1-TAP::HIS3MX6* amplified from AJY2665 into AJY3243 and  
435 AJY3711, respectively. All yeast were cultured at 30°C in either YPD (2% peptone, 1% yeast  
436 extract, 2% dextrose), YPgal(2% peptone, 1% yeast extract, 1% galactose), or synthetic  
437 dropout (SD) medium containing 2% dextrose unless otherwise noted. All plasmids used in  
438 this study are listed in Table 2.

439

440 **Yeast two-hybrid (Y2H) analysis.** GAL4 activation domain (AD)-containing vectors were  
441 transformed into PJ69-4a, and GAL4 DNA binding domain (BD)-containing vectors were  
442 transformed into PJ69-4alpha. Cells harboring these vectors were mated on YPD plates and then  
443 replica plated onto SD medium lacking leucine and tryptophan (SD Leu<sup>-</sup> Trp<sup>-</sup> medium) to select  
444 for diploid cells harboring both plasmids. The diploid strains were patched on SD Leu<sup>-</sup> Trp<sup>-</sup> and  
445 SD Leu<sup>-</sup> Trp<sup>-</sup> His<sup>-</sup> with or without 3-amino-1,2,4-triazole (3AT) to test for activation of the  
446 *UAS<sub>GAL</sub>-HIS3* reporter gene.

447

448 **UV-crosslinking and analysis of cDNA (CRAC).** A modified version of the CRAC protocol  
449 (Granneman et al. 2009) was performed. Cells from exponential phase cultures AJY4051 and  
450 BY4741 were collected, resuspended in PBS on ice and irradiated at 254nm using a Stratalinker  
451 UV Crosslinker 1800 with 800-1600 mJ/cm<sup>2</sup> and stored at -80°C. Cells were resuspended in ice-  
452 cold TN150 buffer (50 mM Tris-HCl pH 7.8, 150 mM NaCl, 0.1% NP-40, 10 mM β-

453 mercaptoethanol [BME], 2 mM MgCl<sub>2</sub>, 1 mM PMSF, and 1 μM leupeptin and pepstatin) and  
454 extracts were prepared by vortexing with glass beads, and clarified by centrifugation. Extract was  
455 incubated with IgG-Sepharose beads (GE Health Care) for 4 hours at 4°C. The beads were washed  
456 with ice-cold TN1000 buffer (TN150, except 1 M NaCl) then with ice-cold TN150 buffer lacking  
457 protease inhibitors. Protein was released from the resin using GST-TEV for 4 hours at 16°C with  
458 rotation. RNAs were digested with RNase-IT Ribonuclease Cocktail (Agilent Technologies) at  
459 37°C. This mixture was then supplemented to final concentrations of 6 M guanidinium chloride,  
460 10 mM imidazole, and 200 mM NaCl and bound to Ni-NTA resin (Invitrogen) overnight at 4°C.

461 The resin was washed with Buffer I (50 mM Tris-HCl pH 7.8, 300 mM NaCl, 10 mM  
462 imidazole, 6 M guanidinium chloride, 0.1% NP-40, and 10 mM BME) and with T4 Polynucleotide  
463 kinase (PNK) buffer (70 mM Tris-HCl pH 7.6, 10 mM MgCl<sub>2</sub>, and 10 mM BME). RNA retained  
464 on beads was labeled using T4 PNK and <sup>32</sup>P-γ-ATP (PerkinElmer). T4 PNK also removes the 3'-  
465 phosphate remaining from RNase treatment. After labeling, the resin was washed with T4 PNK  
466 buffer, and AIR Adenylated Linker A (Bioo Scientific; 5'-  
467 rAppCTGTAGGCACCATCAAT/3ddC/-3') was ligated at room temperature for 4-6 hours using  
468 T4 RNA Ligase 2 (truncated) (New England Biolabs). The Protein-RNA complex was eluted from  
469 the resin using T4 PNK buffer containing 200 mM imidazole, precipitated with 15%  
470 Trichloroacetic acid (TCA) and 2 μg bovine serum albumin (BSA), washed with ice cold acetone,  
471 air-dried and resuspended in NuPAGE LDS sample buffer. The sample was heated at 70°C for 10  
472 minutes, electrophoresed on a NuPAGE Novex 4-12% Bis-Tris gel, transferred to nitrocellulose  
473 and autoradiographed. A band corresponding approximately to the molecular weight of Utp14 was  
474 excised, treated with Protease K (New England Biolabs) for 2 hours at 55°C and the freed RNA  
475 was extracted with phenol: chloroform and ethanol precipitated.

476 Library preparation followed an established protocol for ribosome foot printing (Ingolia et  
477 al. 2012). cDNA synthesis was done with the primer (5'-(Phos)-  
478 AGATCGGAAGAGCGTCGTGTAGGGAAAGAGTGTAGATCTCGGTGGTCGC-(SpC18)-  
479 CACTCA-(SpC18)-TTCAGACGTGTGCTCTTCCGATCTATTGATGGTGCCTACAG-3') and  
480 either EpiScript RT (Epicentre) or SuperScript III (Invitrogen). Reactions were arrested and RNA  
481 hydrolyzed by the addition of NaOH to 100 mM and heating at 98°C for 20 minutes. cDNA was  
482 precipitated with ethanol, and resuspended in water. Urea loading buffer (Novex) was added to 1X  
483 and the sample was denatured at 80°C for 10 minutes. The cDNA product was electrophoresed on  
484 a 10% Novex TBE-Urea gel and extracted in TE, followed by precipitation with isopropanol. The  
485 purified cDNA product was circularized using CircLigase (Epicentre) incubated at 60°C for 2  
486 hours, then heat-inactivated at 80°C for 10 minutes. To add adaptors to the first dataset, the  
487 circularized product was amplified using Phusion DNA polymerase and oligonucleotides AJO  
488 1986 (5'-AATGATACGGCGACCACCGAGATCTACAC-3') and ScripMiner Index Primer (#11  
489 for mock and #12 for Utp14-HTP). For the second dataset, the circularized product was initially  
490 amplified using Phusion DNA polymerase and flanking oligonucleotides AJO 2299 (5'-  
491 TACACGACGCTCTTCCGATC-3') and AJO 2301 (5'- CAGACGTGTGCTCTTCCGATC -3').  
492 The samples were gel purified as described above, resuspended in water and a subsequent PCR  
493 was done to add adaptor sequences using Phusion DNA polymerase and the oligonucleotides AJO  
494 2352 (5'-  
495 AATGATACGGCGACCACCGAGATCTACACTCTTCCCTACACGACGCTCTTCCGATC  
496 T -3') and a ScriptMiner Index Primer (#2 for mock and #4 for Utp14-HTP). The samples were  
497 electrophoresed and purified from the gel as described above and resuspended in water.

498           The resultant cDNA libraries were sequenced on an Illumina MiSeq platform. The single-  
499 end reads were processed using fastx\_trimmer and fastx\_clipper  
500 ([http://hannonlab.cshl.edu/fastx\\_toolkit/](http://hannonlab.cshl.edu/fastx_toolkit/)) to discard low-quality reads and adapter sequences,  
501 respectively. The processed reads were aligned to the yeast genome (Ensembl, version R64-1-1)  
502 using Bowtie2 (Langmead and Salzberg 2012). The resultant files were analyzed using  
503 pyReadCounters and pyPileup (Webb et al. 2014).

504

505 **Affinity-purification.** Cell growth for affinity-purification are described in the sections below.  
506 All steps were carried out at 4°C unless otherwise noted. For mass spectrometry, cells were  
507 thawed, washed, and resuspended in one volume of Lysis Buffer (20 mM HEPES-KOH pH 8.0,  
508 110 mM KOAc, 40 mM NaCl, 1mM PMSF and benzamidine, and 1 μM leupeptin and pepstatin).  
509 For northern blot analysis, DEPC-treated and nitrocellulose-filtered reagents were used, and cells  
510 were resuspended in 1.5 volume of Lysis Buffer. Extracts were prepared using glass beads and  
511 clarified by centrifugation at 18,000xg for 15 minutes. Clarified extracts were normalized  
512 according to A<sub>260</sub>, and TritonX-100 was added to a final concentration of 0.1% (v/v). Normalized  
513 extract was incubated for 90 minutes with rabbit IgG (Sigma) coupled to Dynabeads (Invitrogen).  
514 The beads were prepared as described (Oeffinger et al. 2007). Following binding, the beads were  
515 washed twice in Wash Buffer (Lysis Buffer supplemented with 0.1% TritonX-100) and once with  
516 in the Wash Buffer containing 5mM βME at 16°C prior to resuspension in Elution Buffer (Lysis  
517 Buffer supplemented with 5 mM βME). For RNA purification, the Elution Buffer was  
518 supplemented with 1 U/μL Murine RNase Inhibitor (New England Biolabs). The bound bait-TAP  
519 containing complexes were eluted by addition of homemade TEV protease and incubated for 90  
520 minutes at 16°C. The resultant eluates were handed as described in the sections below.

521

522 **Northern blot analysis.** For Utp14-TAP affinity-purifications, AJY3243 was transformed with  
523 the plasmids pAJ4176, pAJ4177, pAJ4178, or pRS415, and YS360 was transformed with  
524 pAJ4176. For the Enp1-TAP affinity-purifications, AJY2665, AJY4258, and BY4741 were  
525 transformed with pRS416, and AJY4257 was transformed with pRS416, pAJ3422, or pAJ3426.  
526 Cell cultures were diluted into in the appropriate SD media containing 2% glucose at a starting  
527 OD<sub>600</sub> of 0.1 and cultured for either 7 hours or grown to mid-exponential phase before collection.  
528 Cells were stored at -80°C prior to lysis. Affinity-purifications were performed as described above.  
529 Affinity-purified and whole cell extract (WCE) RNAs were isolated using the acid-phenol-  
530 chloroform method as described (Zhu et al. 2016). RNAs were separated by electrophoresis  
531 through 1.2%-agarose MOPS 6% formaldehyde gel for four hours at 50 volts. Northern blotting  
532 was performed as described (Li et al. 2009) using the oligo probes listed in Figure 6 legend, and  
533 signal was detected by phosphoimaging on a GE Typhoon FLA9500.

534

535 **Mass spectrometry and analysis.** For Utp14-TAP affinity-purifications, AJY3243 was  
536 transformed with the plasmids pAJ4176, pAJ4177, pAJ4178, or pRS415. Cell cultures were  
537 diluted into the appropriate SD media containing 2% glucose at a starting OD<sub>600</sub> of 0.1 and cultured  
538 for either 7 hours or to mid-exponential phase before collection. For the Enp1-TAP affinity-  
539 purifications, AJY2665, AJY4257, and AJY4258 cultures were diluted into YPD at a starting  
540 OD<sub>600</sub> of 0.1 and cultured for either 14 hours or to mid-exponential phase before collection. Cells  
541 were stored at -80°C prior to lysis. Affinity-purifications were done as described above. To isolate  
542 factors associated with only pre-ribosomal particles for mass spectrometry, the eluate was overlaid



543 onto a sucrose cushion (15% D-sucrose, 20 mM HEPES-KOH pH 8.0, 110 mM KOAc, 40 mM  
544 NaCl) then centrifuged at 70,000 rpm for 15 minutes on a Beckman Coulter TLA100 rotor.

545 To perform peptide identification by mass spectrometry, we loaded approximately even  
546 amounts of protein from the pellet fraction onto a NuPAGE Novex 4-12% Bis-Tris gel. Proteins  
547 were electrophoresed slightly into the gel then stained with Coomassie. A small gel slice  
548 containing the proteins was excised and dehydrated with acetonitrile, reduced with 10 mM DTT,  
549 then alkylated with 50 mM iodoacetamide. The gel slice was washed with 100 mM ammonium  
550 bicarbonate then dehydrated with acetonitrile. In-gel digestion was performed using trypsin  
551 (Peirce) in 50 mM ammonium bicarbonate overnight at 37°C. Peptides were extracted with 5%  
552 (w/v) formic acid treatment, then with 1:2 (v/v) 5% formic acid : 100% acetonitrile treatment.  
553 These solutions were combined with the trypsin digest solution and desalted. The resultant  
554 peptides were run for one hour on a Dionex LC and Orbitrap Fusion 1 for LC-MS/MS.

555 Mass spectrometry data were processed in Scaffold v4.8.3 (Proteome Software, Inc.), and  
556 a protein threshold of 99% minimum and 2 peptides minimum, and peptide threshold of 0.1% FDR  
557 was applied. The data were exported to Microsoft Excel then custom Python 2.7 scripts were used  
558 to calculate the relative spectral abundance factor (RSAF) for each protein by dividing the total  
559 number of spectral counts by the molecular weight. For each sample, the RSAF value of each  
560 protein was normalized to the mean RSAF value of the UTP-B sub-complex in Microsoft Excel to  
561 reflect relative stoichiometry as done previously (Zhang et al. 2016). Supplemental File 2 contains  
562 relevant spectral counts and processed data from the mass spectrometry experiments.

563

564 **ACKNOWLEDGEMENTS**

565 We wish to thank J. Recchia-Rife for his assistance with cloning and J.A. Hussmann for his initial  
566 assistance with the CRAC data analysis. We thank Dr. E. Petfalski for strain YS360

567

#### 568 **FUNDING INFORMATION**

569 This work was supported by grant NIH GM108823 to AWJ. The Proteomics Facility in the Center  
570 for Biomedical Research Support at the University of Texas at Austin is supported in part by the  
571 CPRIT grant RP110782.

572

#### 573 **DATA AVAILABILITY**

574 All relevant sequencing data have been deposited in the Gene Expression Omnibus (GEO)  
575 database (<http://www.ncbi.nlm.nih.gov/geo/>) with the accession number XXXXX. Python scripts  
576 are available upon request.

577

#### 578 **REFERENCES**

- 579 Barandun J, Chaker-Margot M, Hunziker M, Molloy KR, Chait BT, Klinge S. 2017. The  
580 complete structure of the small-subunit processome. *Nat Struct Mol Biol* 1–36.
- 581 Baßler J, Ahmed YL, Kallas M, Kornprobst M, Calviño FR, Gnädig M, Thoms M, Stier G,  
582 Ismail S, Kharde S, et al. 2016. Interaction network of the ribosome assembly machinery  
583 from a eukaryotic thermophile. *Protein Sci* **22**: 1–50.
- 584 Ben-Shem A, Garreau de Loubresse N, Melnikov S, Jenner L, Yusupova G, Yusupov M. 2011.  
585 The structure of the eukaryotic ribosome at 3.0 Å resolution. *Science* **334**: 1524–9.
- 586 Chaker-Margot M, Barandun J, Hunziker M, Klinge S. 2017. Architecture of the yeast small  
587 subunit processome. *Science* **355**.

- 588 Chaker-Margot M, Hunziker M, Barandun J, Dill BD, Klinge S. 2015. Stage-specific assembly  
589 events of the 6-MDa small-subunit processome initiate eukaryotic ribosome biogenesis. *Nat*  
590 *Struct Mol Biol* **22**: 920–3.
- 591 Cheng J, Kellner N, Berninghausen O, Hurt E, Beckmann R. 2017. 3.2-Å-resolution structure of  
592 the 90S preribosome before A1 pre-rRNA cleavage. *Nat Struct Mol Biol*.
- 593 Dragon F, Gallagher JEG, Compagnone-Post PA, Mitchell BM, Porwancher KA, Wehner KA,  
594 Wormsley S, Settlage RE, Shabanowitz J, Osheim Y, et al. 2002. A large nucleolar U3  
595 ribonucleoprotein required for 18S ribosomal RNA biogenesis. *Nature* **417**: 967–70.
- 596 Ferreira-Cerca S, Pöll G, Gleizes P-E, Tschochner H, Milkereit P. 2005. Roles of eukaryotic  
597 ribosomal proteins in maturation and transport of pre-18S rRNA and ribosome function.  
598 *Mol Cell* **20**: 263–75.
- 599 Ghaemmaghami S, Huh W-K, Bower K, Howson RW, Belle a, Dephoure N, O’Shea EK,  
600 Weissman JS. 2003. Global analysis of protein expression in yeast. *Nature* **425**: 737–741.
- 601 Granneman S, Kudla G, Petfalski E, Tollervey D. 2009. Identification of protein binding sites on  
602 U3 snoRNA and pre-rRNA by UV cross-linking and high-throughput analysis of cDNAs.  
603 *Proc Natl Acad Sci U S A* **106**: 9613–8.
- 604 Henras AK, Soudet J, Gêrus M, Lebaron S, Caizergues-Ferrer M, Mouglin A, Henry Y. 2008.  
605 The post-transcriptional steps of eukaryotic ribosome biogenesis. *Cell Mol Life Sci* **65**:  
606 2334–2359.
- 607 Heuer A, Thomson E, Schmidt C, Berninghausen O, Becker T, Hurt E, Beckmann R. 2017.  
608 Cryo-EM structure of a late pre-40S ribosomal subunit from *Saccharomyces cerevisiae*.  
609 *Elife* **6**.
- 610 Ingolia NT, Brar GA, Rouskin S, McGeachy AM, Weissman JS. 2012. The ribosome profiling

- 611 strategy for monitoring translation in vivo by deep sequencing of ribosome-protected  
612 mRNA fragments. *Nat Protoc* **7**: 1534–50.
- 613 James P, Halladay J, Craig E a. 1996. Genomic libraries and a host strain designed for highly  
614 efficient two-hybrid selection in yeast. *Genetics* **144**: 1425–36.
- 615 Johnson MC, Ghalei H, Doxtader KA, Karbstein K, Stroupe ME. 2017. Structural Heterogeneity  
616 in Pre-40S Ribosomes. *Structure* **25**: 329–340.
- 617 Kornprobst M, Turk M, Kellner N, Cheng J, Flemming D, Koš-Braun I, Koš M, Thoms M,  
618 Berninghausen O, Beckmann R, et al. 2016. Architecture of the 90S Pre-ribosome: A  
619 Structural View on the Birth of the Eukaryotic Ribosome. *Cell* **166**: 380–93.
- 620 Kressler D, Hurt E, Baßler J. 2017. A Puzzle of Life: Crafting Ribosomal Subunits. *Trends*  
621 *Biochem Sci* **42**: 640–654.
- 622 Langmead B, Salzberg SL. 2012. Fast gapped-read alignment with Bowtie 2. *Nat Methods* **9**:  
623 357–9.
- 624 Li Z, Lee I, Moradi E, Hung N-J, Johnson AW, Marcotte EM. 2009. Rational extension of the  
625 ribosome biogenesis pathway using network-guided genetics. *PLoS Biol* **7**: e1000213.
- 626 Lin J, Lu J, Feng Y, Sun M, Ye K. 2013. An RNA-binding complex involved in ribosome  
627 biogenesis contains a protein with homology to tRNA CCA-adding enzyme. *PLoS Biol* **11**:  
628 e1001669.
- 629 Martin R, Hackert P, Ruprecht M, Simm S, Brüning L, Mirus O, Sloan KE, Kudla G, Schleiff E.  
630 2014. A pre-ribosomal RNA interaction network involving snoRNAs and the A pre-  
631 ribosomal RNA interaction network involving snoRNAs and the Rok1 helicase. *RNA* **20**: 1–  
632 10.
- 633 Oeffinger M, Wei KE, Rogers R, DeGrasse JA, Chait BT, Aitchison JD, Rout MP. 2007.

- 634           Comprehensive analysis of diverse ribonucleoprotein complexes. *Nat Methods* **4**: 951–6.
- 635   Patel SS, Belmont BJ, Sante JM, Rexach MF. 2007. Natively unfolded nucleoporins gate protein  
636           diffusion across the nuclear pore complex. *Cell* **129**: 83–96.
- 637   Peña C, Hurt E, Panse VG. 2017. Eukaryotic ribosome assembly, transport and quality control.  
638           *Nat Struct Mol Biol* **24**: 689–699.
- 639   Sardana R, Liu X, Granneman S, Zhu J, Gill M, Papoulas O, Marcotte EM, Tollervey D, Correll  
640           CC, Johnson AW. 2015. The DEAH-box helicase Dhr1 dissociates U3 from the pre-rRNA  
641           to promote formation of the central pseudoknot. *PLoS Biol* **13**: e1002083.
- 642   Sardana R, White JP, Johnson AW. 2013. The rRNA methyltransferase Bud23 shows functional  
643           interaction with components of the SSU processome and RNase MRP. *RNA* **19**: 828–40.
- 644   Sikorski RS, Hieter P. 1989. A system of shuttle vectors and yeast host strains designed for  
645           efficient manipulation of DNA in *Saccharomyces cerevisiae*. *Genetics* **122**: 19–27.
- 646   Sloan KE, Warda AS, Sharma S, Entian K-D, Lafontaine DLJ, Bohnsack MT. 2016. Tuning the  
647           ribosome: The influence of rRNA modification on eukaryotic ribosome biogenesis and  
648           function. *RNA Biol* **408**: 1–16.
- 649   Sturm M, Cheng J, Baßler J, Beckmann R, Hurt E. 2017. Interdependent action of KH domain  
650           proteins Krr1 and Dim2 drive the 40S platform assembly. *Nat Commun* **8**: 2213.
- 651   Sun Q, Zhu X, Qi J, An W, Lan P, Tan D, Chen R, Wang B, Zheng S, Zhang C, et al. 2017.  
652           Molecular architecture of the 90S small subunit pre-ribosome. *Elife* **6**: e22086.
- 653   Thoms M, Thomson E, Baßler J, Gnädig M, Griesel S, Hurt E. 2015. The Exosome Is Recruited  
654           to RNA Substrates through Specific Adaptor Proteins. *Cell* **162**: 1029–38.
- 655   Vanrobays E, Gélugne J-P, Caizergues-Ferrer M, Lafontaine DLJ. 2004. Dim2p, a KH-domain  
656           protein required for small ribosomal subunit synthesis. *RNA* **10**: 645–56.

- 657 Vincent NG, Charette JM, Baserga SJ. 2018. The SSU processome interactome in  
 658 *Saccharomyces cerevisiae* reveals novel protein subcomplexes. *RNA* **24**: 77–89.
- 659 Webb S, Hector RD, Kudla G, Granneman S. 2014. PAR-CLIP data indicate that Nrd1-Nab3-  
 660 dependent transcription termination regulates expression of hundreds of protein coding  
 661 genes in yeast. *Genome Biol* **15**: R8.
- 662 Zhang L, Wu C, Cai G, Chen S, Ye K. 2016. Stepwise and dynamic assembly of the earliest  
 663 precursors of small ribosomal subunits in yeast. *Genes Dev* **30**: 718–32.
- 664 Zhu J, Liu X, Anjos M, Correll CC, Johnson AW. 2016. Utp14 Recruits and Activates the RNA  
 665 Helicase Dhr1 To Undock U3 snoRNA from the Preribosome. *Mol Cell Biol* **36**: 965–78.

667 **TABLES**

668 **Table 1: Strains used in this study.**

| Strain      | Genotype                                                                                                    | Source                     |
|-------------|-------------------------------------------------------------------------------------------------------------|----------------------------|
| AJY2665     | <i>MATa his3Δ1 leu2Δ0 met15Δ0 ura3Δ0 ENP1-TAP::HIS3MX6</i>                                                  | (Ghaemmaghami et al. 2003) |
| AJY3243     | <i>MATa KanMX6-P<sub>GALI</sub>-3xHA-UTP14 his3Δ1 leu2Δ0 ura3Δ0</i>                                         | (Zhu et al. 2016)          |
| AJY3711     | <i>MATa KanMX6-P<sub>GALI</sub>-3xHA-DHR1 his3Δ1 leu2Δ0 met15Δ0 ura3Δ0</i>                                  | (Sardana et al. 2015)      |
| AJY4051     | <i>MATa his3Δ1 leu2Δ0 met15Δ0 UTP14-HTP::URA3</i>                                                           | This study                 |
| AJY4257     | <i>MATa his3Δ1 leu2Δ0 met15Δ0 ura3Δ0 ENP1-TAP::HIS3MX6 KanMX6-P<sub>GALI</sub>-3xHA-UTP14</i>               | This study                 |
| AJY4258     | <i>MATa his3Δ1 leu2Δ0 met15Δ0 ura3Δ0 ENP1-TAP::HIS3MX6 KanMX6-P<sub>GALI</sub>-3xHA-DHR1</i>                | This study                 |
| BY4741      | <i>MATa his3Δ1 leu2Δ0 met15Δ0 ura3Δ0</i>                                                                    | Open Biosystems            |
| PJ69-4a     | <i>MATa trp1-901 leu2-3,112 ura3-52 his3-200 gal4Δ gal80Δ LYS2::GAL1-HIS3 GAL2-ADE2 met2::GAL7-lacZ</i>     | (James et al. 1996)        |
| PJ69-4alpha | <i>MATalpha trp1-901 leu2-3,112 ura3-52 his3-200 gal4Δ gal80Δ LYS2::GAL1-HIS3 GAL2-ADE2 met2::GAL7-lacZ</i> | (James et al. 1996)        |

|       |                                                                           |                           |
|-------|---------------------------------------------------------------------------|---------------------------|
| YS360 | <i>MATa his3Δ1 leu2Δ0 met15Δ0 ura3Δ0 KanMX6-P<sub>GAL1</sub>-3HA-MTR4</i> | E. Petfalski, unpublished |
|-------|---------------------------------------------------------------------------|---------------------------|

669

670 **Table 2: Plasmids used in this study.**

| Plasmid | Description                                                       | Source            |
|---------|-------------------------------------------------------------------|-------------------|
| pACT2   | GAL4AD-HA <i>LEU2</i> 2μ                                          | Clontech          |
| pAJ2321 | GAL4AD-HA- <i>UTP14</i> <i>LEU2</i> 2μ                            | (Zhu et al. 2016) |
| pAJ2324 | GAL4BD-c-myc- <i>UTP14</i> <i>TRP1</i> 2μ                         | This study        |
| pAJ2334 | GAL4AD-HA- <i>utp14</i> <sub>1-706</sub> <i>LEU2</i> 2μ           | (Zhu et al. 2016) |
| pAJ2335 | GAL4AD-HA- <i>utp14</i> <sub>707-899</sub> <i>LEU2</i> 2μ         | (Zhu et al. 2016) |
| pAJ2341 | GAL4AD-HA- <i>utp14</i> <sub>1-813</sub> <i>LEU2</i> 2μ           | (Zhu et al. 2016) |
| pAJ2342 | GAL4AD-HA- <i>utp14</i> <sub>1-654</sub> <i>LEU2</i> 2μ           | (Zhu et al. 2016) |
| pAJ2343 | GAL4AD-HA- <i>utp14</i> <sub>1-564</sub> <i>LEU2</i> 2μ           | (Zhu et al. 2016) |
| pAJ2344 | GAL4AD-HA- <i>utp14</i> <sub>1-265</sub> <i>LEU2</i> 2μ           | (Zhu et al. 2016) |
| pAJ2345 | GAL4AD-HA- <i>utp14</i> <sub>266-899</sub> <i>LEU2</i> 2μ         | (Zhu et al. 2016) |
| pAJ2346 | GAL4AD-HA- <i>utp14</i> <sub>565-899</sub> <i>LEU2</i> 2μ         | (Zhu et al. 2016) |
| pAJ2347 | GAL4AD-HA- <i>utp14</i> <sub>655-899</sub> <i>LEU2</i> 2μ         | (Zhu et al. 2016) |
| pAJ3422 | <i>utp14</i> <sub>1-706</sub> <i>URA3</i> <i>CEN</i> <i>ARS</i>   | This study        |
| pAJ3426 | <i>utp14</i> <sub>266-899</sub> <i>URA3</i> <i>CEN</i> <i>ARS</i> | This study        |
| pAJ3624 | GAL4AD-HA- <i>RPS1A</i> <i>LEU2</i> 2μ                            | This study        |
| pAJ3625 | GAL4BD-c-myc- <i>utp14</i> <sub>1-706</sub> <i>TRP1</i> 2μ        | This study        |
| pAJ3626 | GAL4BD-c-myc- <i>utp14</i> <sub>1-813</sub> <i>TRP1</i> 2μ        | This study        |
| pAJ3627 | GAL4BD-c-myc- <i>utp14</i> <sub>1-654</sub> <i>TRP1</i> 2μ        | This study        |
| pAJ3628 | GAL4BD-c-myc- <i>utp14</i> <sub>1-564</sub> <i>TRP1</i> 2μ        | This study        |
| pAJ3629 | GAL4BD-c-myc- <i>utp14</i> <sub>1-265</sub> <i>TRP1</i> 2μ        | This study        |
| pAJ3832 | GAL4BD-c-myc- <i>utp14</i> <sub>266-899</sub> <i>TRP1</i> 2μ      | This study        |

|         |                                                       |                            |
|---------|-------------------------------------------------------|----------------------------|
| pAJ3833 | GAL4BD-c-myc- <i>utp14</i> <sub>565-899</sub> TRP1 2μ | This study                 |
| pAJ3834 | GAL4BD-c-myc- <i>utp14</i> <sub>655-899</sub> TRP1 2μ | This study                 |
| pAJ3835 | GAL4BD-c-myc- <i>utp14</i> <sub>707-899</sub> TRP1 2μ | This study                 |
| pAJ3846 | GAL4AD-HA-UTP22 LEU2 2μ                               | This study                 |
| pAJ4068 | GAL4BD-c-myc-PNO1 TRP1 2μ                             | This study                 |
| pAJ4176 | UTP14-TAP LEU2 CEN ARS                                | This study                 |
| pAJ4177 | <i>utp14</i> <sub>1-706</sub> -TAP LEU2 CEN ARS       | This study                 |
| pAJ4178 | <i>utp14</i> <sub>266-899</sub> -TAP LEU2 CEN ARS     | This study                 |
| pAJ4179 | GAL4AD-HA-RPS7A LEU2 2μ                               | This study                 |
| pAJ4182 | GAL4BD-c-myc-RPS22A TRP1 2μ                           | This study                 |
| pGADT7  | GAL4AD-HA LEU2 2μ                                     | (Patel et al. 2007)        |
| pGBKT7  | GAL4BD-c-myc TRP1 2μ                                  | (Patel et al. 2007)        |
| pRS415  | LEU2 CEN ARS                                          | (Sikorski and Hieter 1989) |
| pRS416  | URA3 CEN ARS                                          | (Sikorski and Hieter 1989) |

671

## 672 FIGURE LEGENDS

673 **Figure 1. Utp14 crosslinks to multiple regions within the pre-18S rRNA.** (A) A representative  
674 autoradiograph of <sup>32</sup>P-labelled RNAs crosslinked to Utp14-HTP (+, AJY4051) and mock (-,  
675 BY4741). Red boxes indicate the regions of the membrane that were excised and used in library  
676 preparation. (B) Percentages of RNA composition grouped by class are shown for both CRAC  
677 replicates. Total aligned reads corresponding to each sample are shown below. (C, D) The number  
678 of reads (top) and substitutions (middle) are shown against nucleotide position within the pre-18S  
679 rRNA (*RDNI8-1*). The number of reads against nucleotide position within the 35S rRNA (*RDN37-1*)  
680 are shown below. Utp14-HTP is shown in light blue, and the mock is shown as grey. Two  
681 independent biological replicates are shown. (E) Utp14 crosslinks within 18S rRNA (red) and 5'-  
682 ETS (orange) mapped to a recent structure of the SSU Processome. RNAs that were not crosslinked  
683 with Utp14 are shown in surface representation for 18S rRNA (grey) and 5'-ETS (yellow) (PDB:



684 5WYJ). (F) The number of reads mapping to positions in U3 (*snR17A*) for datasets #1 (top) and  
685 #2 (bottom). A cartoon of U3 is shown below the plots. (G) A cartoon of U3 hybridization to the  
686 rRNA within the SSU Processome displaying Dhr1 crosslinks (blue triangles) and mutations of  
687 U3 that suppress a cold-sensitive Dhr1 mutant (black triangles) (Sardana et al. 2015) in relation to  
688 Utp14 crosslinks to U3 and the rRNA (magenta highlights). Relevant processed data are reported  
689 in Supplemental File 1.

690

691 **Figure 2. Residues 1-265 of Utp14 interact with proteins associated with helix 26.** (A) Proteins  
692 that bind near Utp14 crosslinking sites in the SSU Processome (PDB: 5WYJ). Utp22 (green), Rps1  
693 (blue), and Rps7 (magenta) are shown. Pno1 (cyan) is also shown for perspective. Utp14  
694 crosslinking sites are shown in red (18S rRNA) and orange (5'-ETS). 18S rRNA (grey), 5'-ETS  
695 (yellow), and U3 (light blue) is shown in surface representation. (B) Yeast two-hybrid interaction  
696 data between Utp14 and Utp22 and Utp14 and Rps1 are shown. Strains carrying the indicated  
697 constructs were patched onto Leu<sup>-</sup> Trp<sup>-</sup> (L<sup>-</sup>W<sup>-</sup>) and Leu<sup>-</sup> Trp<sup>-</sup> His<sup>-</sup> (L<sup>-</sup>W<sup>-</sup>H<sup>-</sup>) media supplemented  
698 with 3-Amino-1,2,4-triazole (3AT) as indicated. (BD, GAL4BD; AD, GAL4AD). A cartoon of  
699 the Utp14 constructs indicating amino acid positions is shown to the right.

700

701 **Figure 3. Residues 707-813 of Utp14 interact with Pno1.** (A) Proteins that bind in the vicinity  
702 of the Utp14 crosslinking sites in the SSU Processome (PDB: 5WYJ). Coloring is the same as  
703 Figure 2A. (B) Yeast two-hybrid interaction data between Utp14 fragments and Pno1 are shown.  
704 Strains carrying the indicated constructs were patched onto Leu<sup>-</sup> Trp<sup>-</sup> (L<sup>-</sup>W<sup>-</sup>) and Leu<sup>-</sup> Trp<sup>-</sup> His<sup>-</sup>  
705 (L<sup>-</sup>W<sup>-</sup>H<sup>-</sup>) media supplemented with 3AT. (Abbreviations as used in Fig. 2) A cartoon of the Utp14  
706 constructs indicating amino acid positions is shown to the left.

707

708 **Figure 4. Proteomic profiles of mutant Utp14 particles.** A heatmap representing the RSAF of  
709 each assembly factor identified by mass spectrometry relative to the mean RSAF of the UTP-B  
710 sub-complex of each sample for the affinity-purifications of (A) the Enp1-TAP constructs from  
711 strains depleted of Utp14 or Dhr1. (B) Ten-fold serial dilutions of AJY3243 cells harboring the  
712 indicated plasmids were grown at 30 °C for two days. (C) A heatmap displaying data processed in  
713 the same manner as (A) but from strains harboring the Utp14-TAP constructs. Coloring for the  
714 heatmaps reflect apparent stoichiometry of each factor: green color represents RSAF values less  
715 than zero, black color represents an RSAF value of approximately one, and red color represents an  
716 RSAF of approximately two or greater. Proteins are grouped according to their order of recruitment  
717 to the pre-ribosome as reported in (Zhang et al. 2016) or by function. Heatmaps were generated in  
718 Graphpad Prism version 7.0c.169 for Mac iOS ([www.graphpad.com](http://www.graphpad.com)). The data these heatmaps  
719 represent are reported in Supplemental File 2.

720

721 **Figure 5. The N-terminus of Utp14 interacts with an extraribosomal Rps7-Rps22**  
722 **heterodimer.** (A) Coomassie-stained gel of proteins that co-purified with full-length or truncated  
723 Utp14 proteins. Pellet and supernatant fractions were separated by overlaying eluate onto sucrose  
724 cushions followed by ultracentrifugation. The arrow heads in lane 6 indicate Utp14- $\Delta$ C  
725 (~150kDa), Rps7 (~20kDa), and Rps22 (~10kDa). (B) Yeast two-hybrid interaction data for Rps7  
726 and Rps22. (C) Yeast two-hybrid interaction data between Utp14 and Rps7 are shown. A cartoon  
727 of the Utp14 constructs is shown to the right. Abbreviations as in legend of Fig. 2.

728

729 **Figure 6. The rRNA processing intermediates associated with mutant Utp14 particles.** (A) A  
730 cartoon of rRNA processing and oligos used to detect intermediates. The sequences for the probes  
731 are: 5'-A<sub>0</sub> (5'-GGTCTCTCTGCTGCCGGAAATG-3'), A<sub>0</sub>-A<sub>1</sub> (5'-  
732 CCCACCTATTCCCTCTTGC-3'), D-A<sub>2</sub> (5'-TCTTGCCCAGTAAAAGCTCTCATGC-3'), A<sub>2</sub>-  
733 A<sub>3</sub> (5'-TGTTACCTCTGGGCCCCGATTG-3'). (B, C) Northern blots for rRNA processing  
734 intermediates affinity-purified via (B) TAP-tagged Utp14 full length and truncation mutants or  
735 untagged wild-type (mock) and (C) TAP-tagged Enp1 from cells depleted of Utp14 or Dhr1,  
736 conditionally expressing Utp14 truncation mutants or from untagged Enp1 (mock). Images were  
737 captured on a Typhoon FLA9500 and processed in ImageJ.

738

739 **Figure 7. Model for Utp14 interaction with the SSU Processome.** (A) A composite of Utp14  
740 (rainbow; from PDB 5TZS) fitted into an SSU Processome structure (PDB 5WYJ) is shown.  
741 Dashed lines are shown to highlight the interactions identified in this work. Black numbers indicate  
742 the residues of Utp14 where the strands of resolved residues end. Rps7 (magenta), Rps22 (orange),  
743 Utp22 (green), Rps1 (blue), and Pno1 (cyan) are shown as cartoon representation. Binding site of  
744 Utp14 in 18S binding sites (red) and in 5'-ETS sites (orange), other regions of 18S rRNA (grey),  
745 5-ETS (yellow), and U3 (light blue) are also shown as surface representation. (B) A model for the  
746 stepwise entry of Utp14, Dhr1, and exosome into the SSU Processome in which the assembly of  
747 Utp14 promotes the recruitment of the exosome. Relevant factors and rRNA elements are shown  
748 and colored the same as in (A).

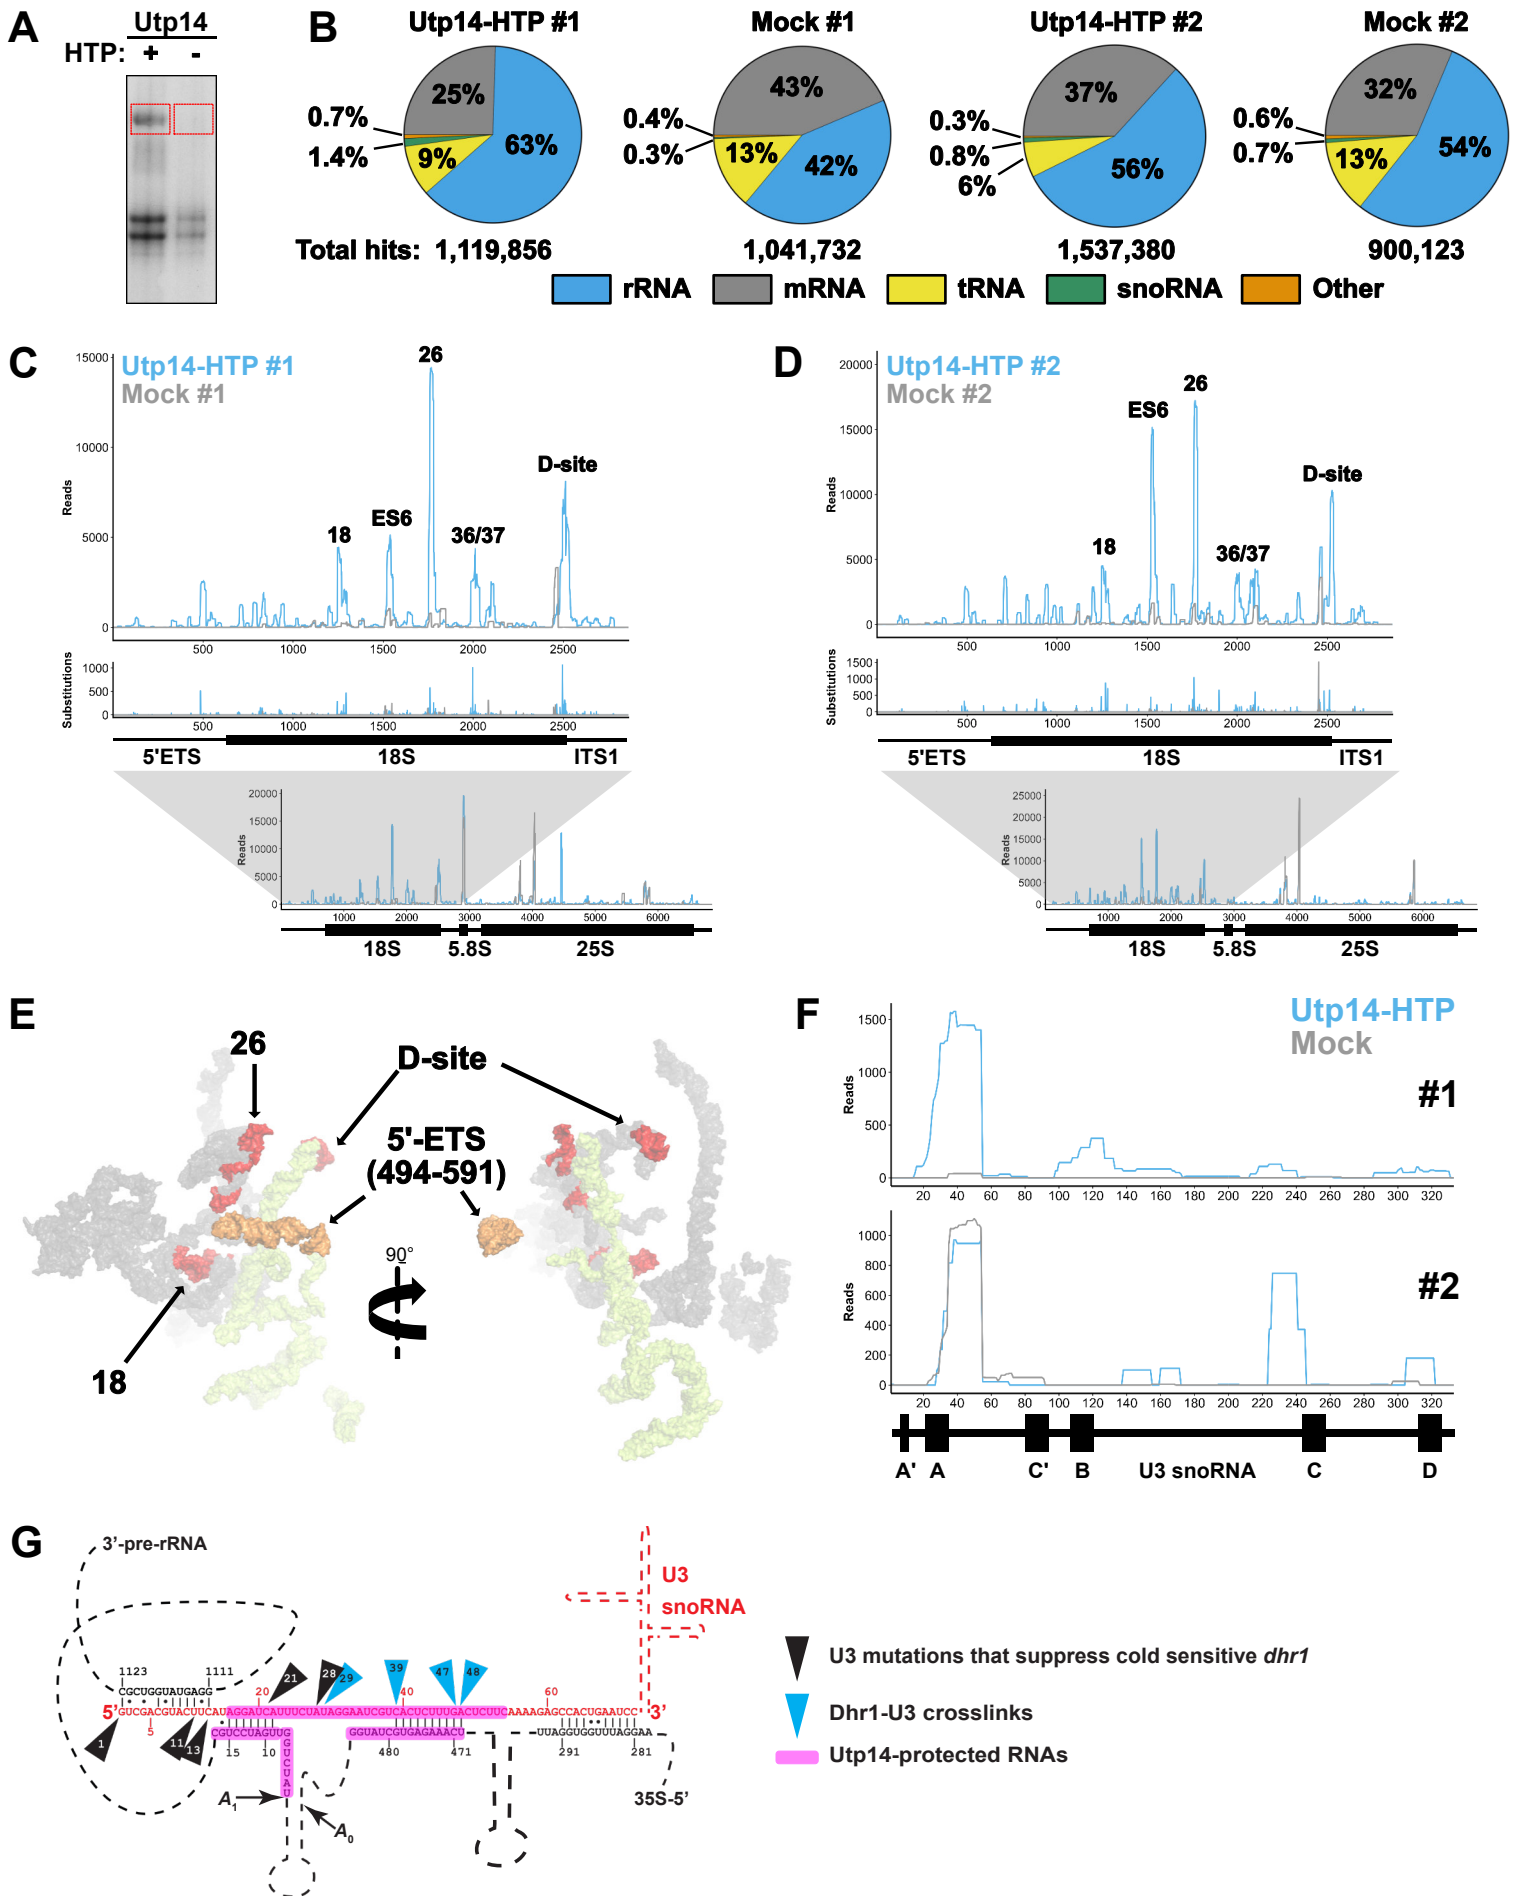

Figure 1, Black et al, 2018

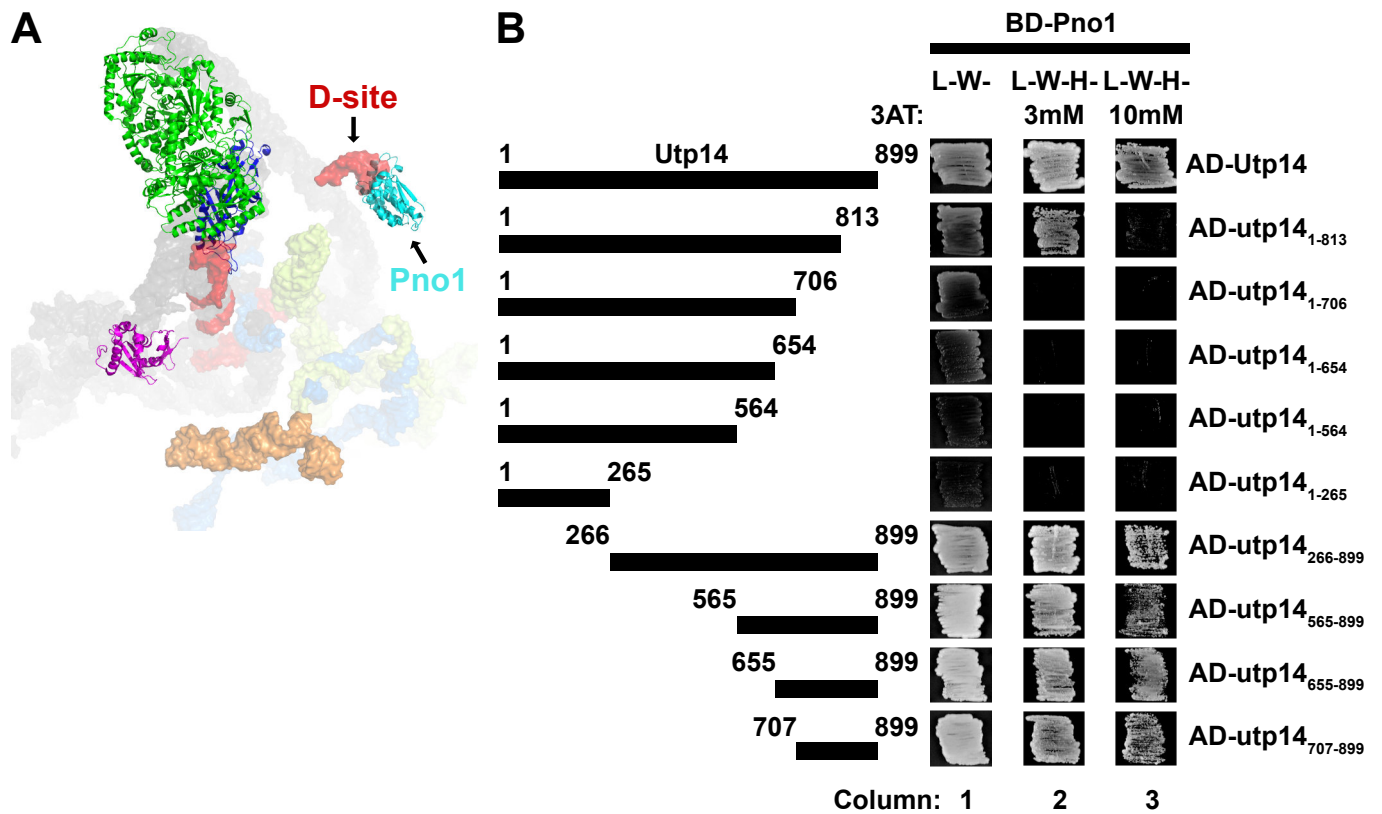

Figure 3, Black et al, 2018

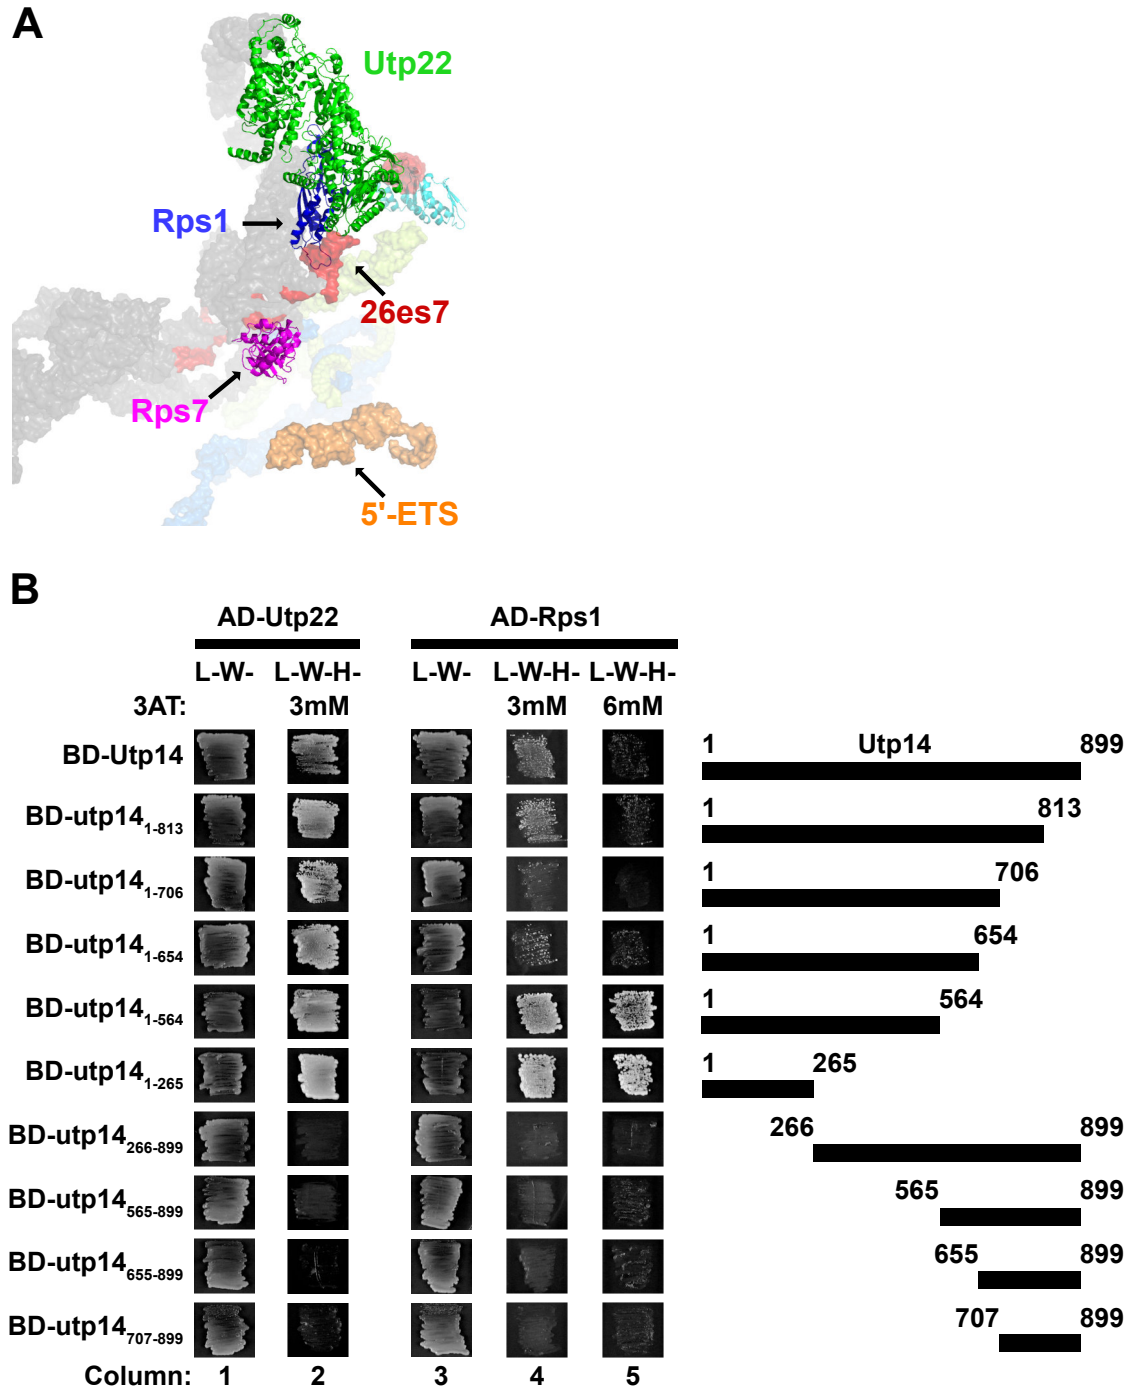

Figure 2, Black et al, 2018

**B**

**GAL1::3xHA-UTP14**

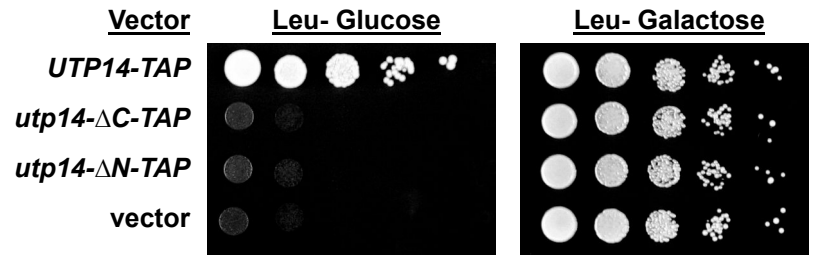

**A**

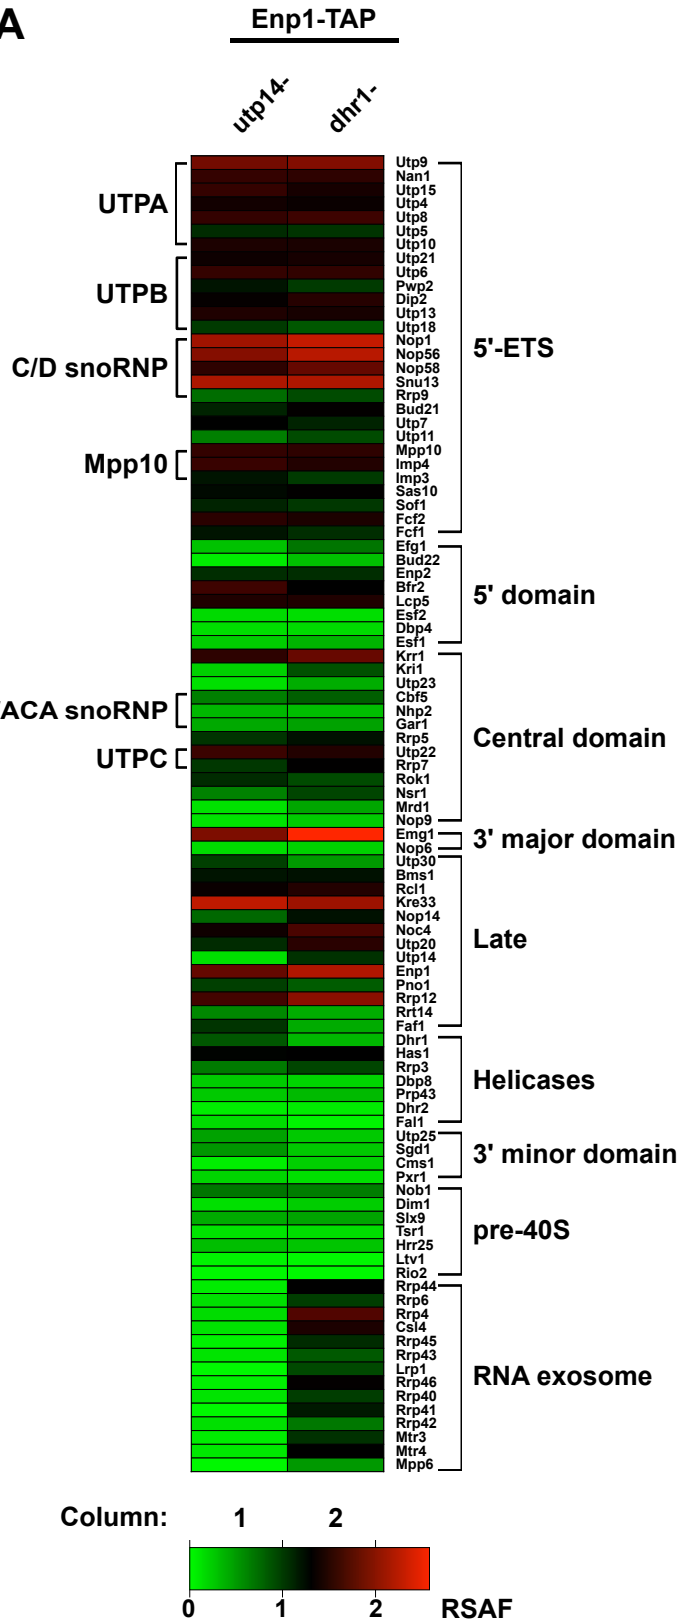

**C**

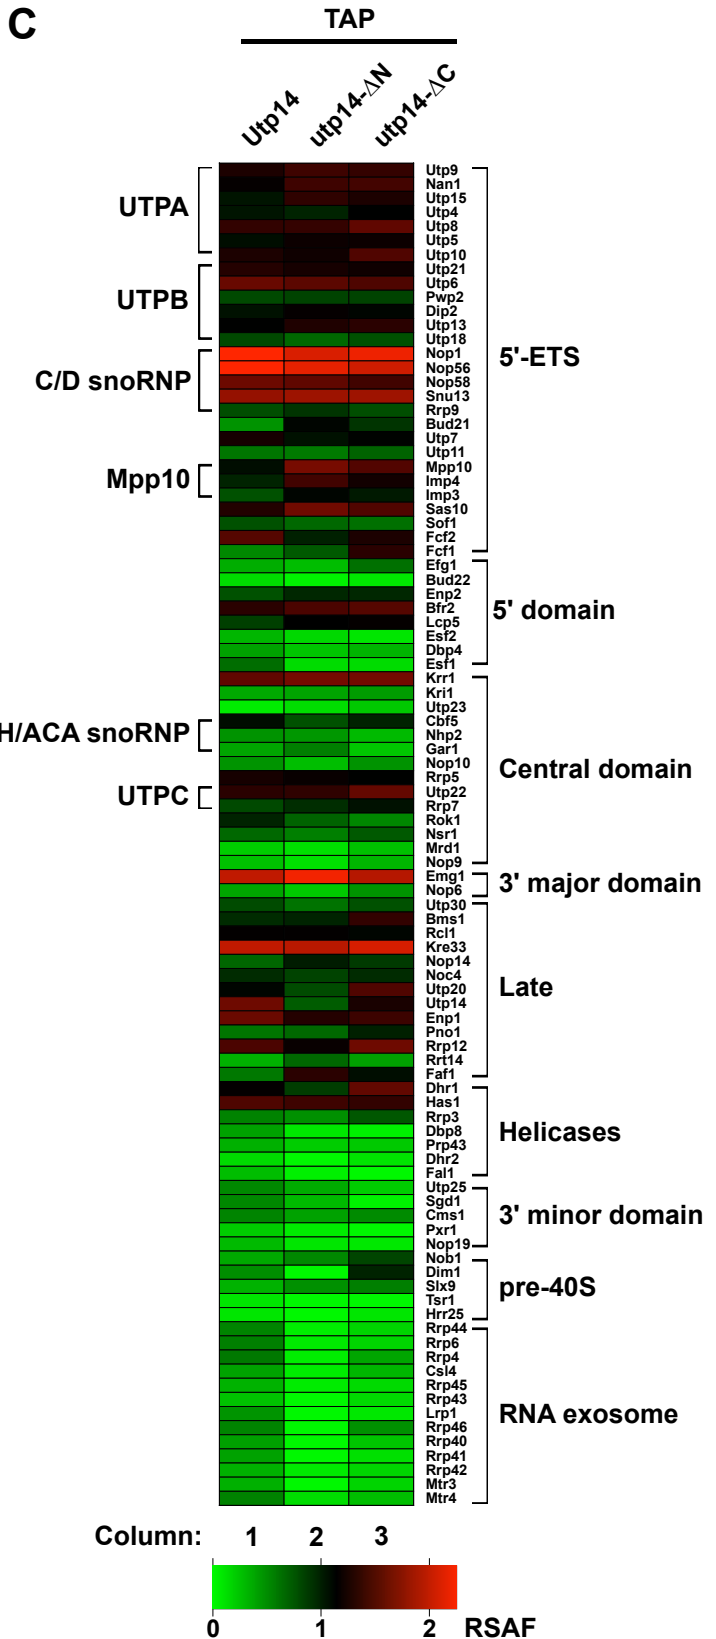

Figure 4, Black et al, 2018

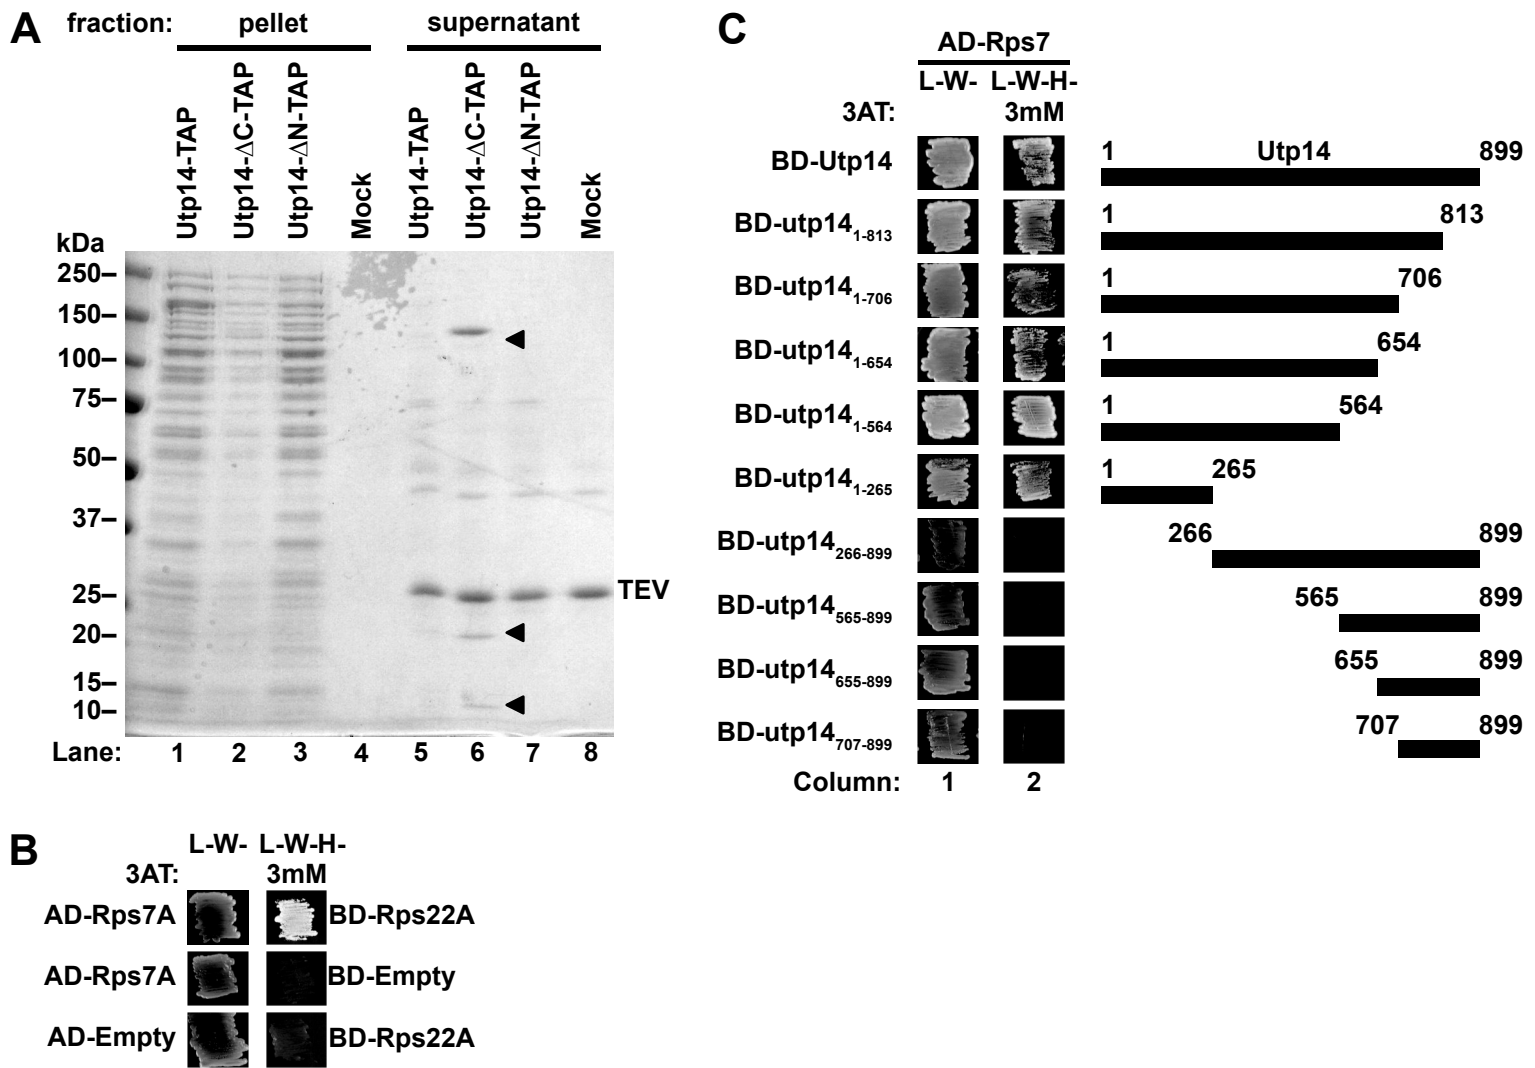

Figure 5, Black et al, 2018



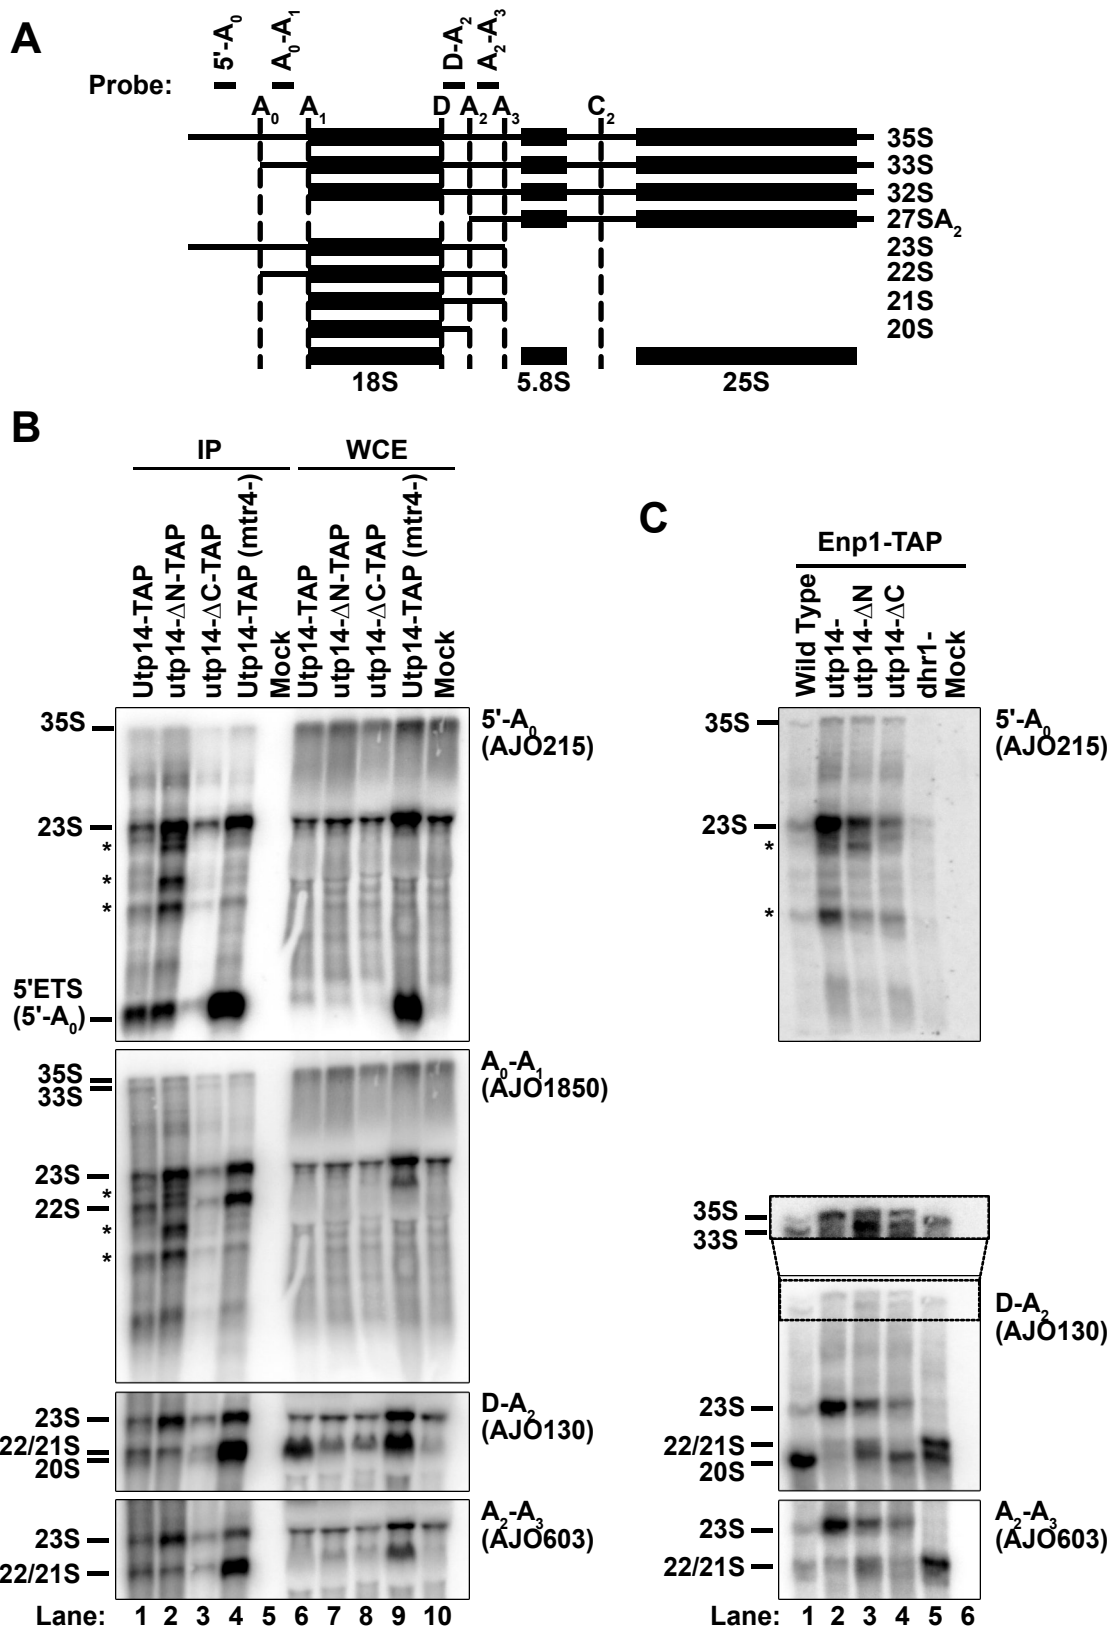

Figure 6, Black et al, 2018

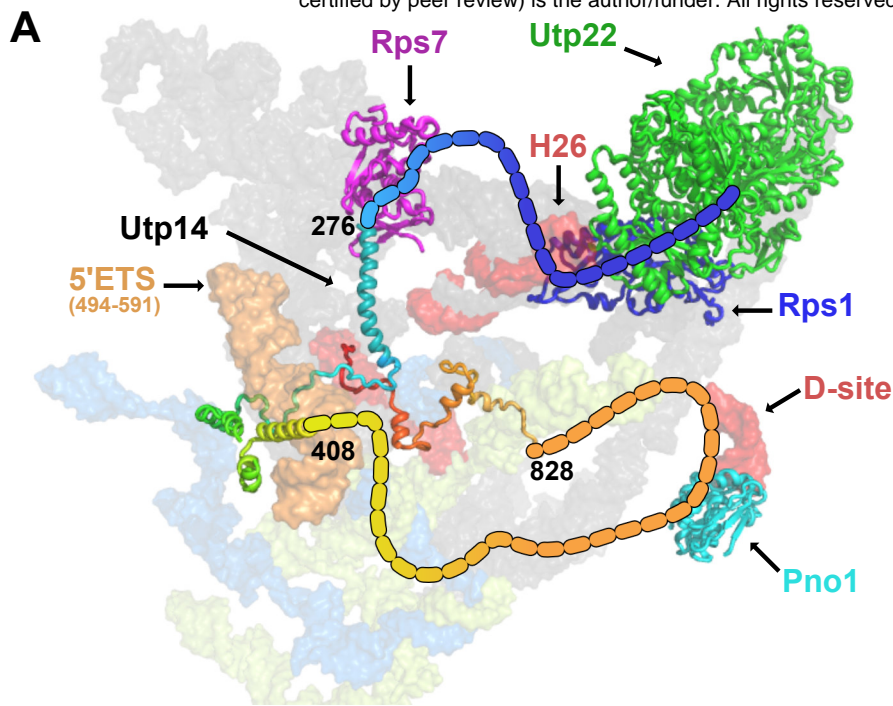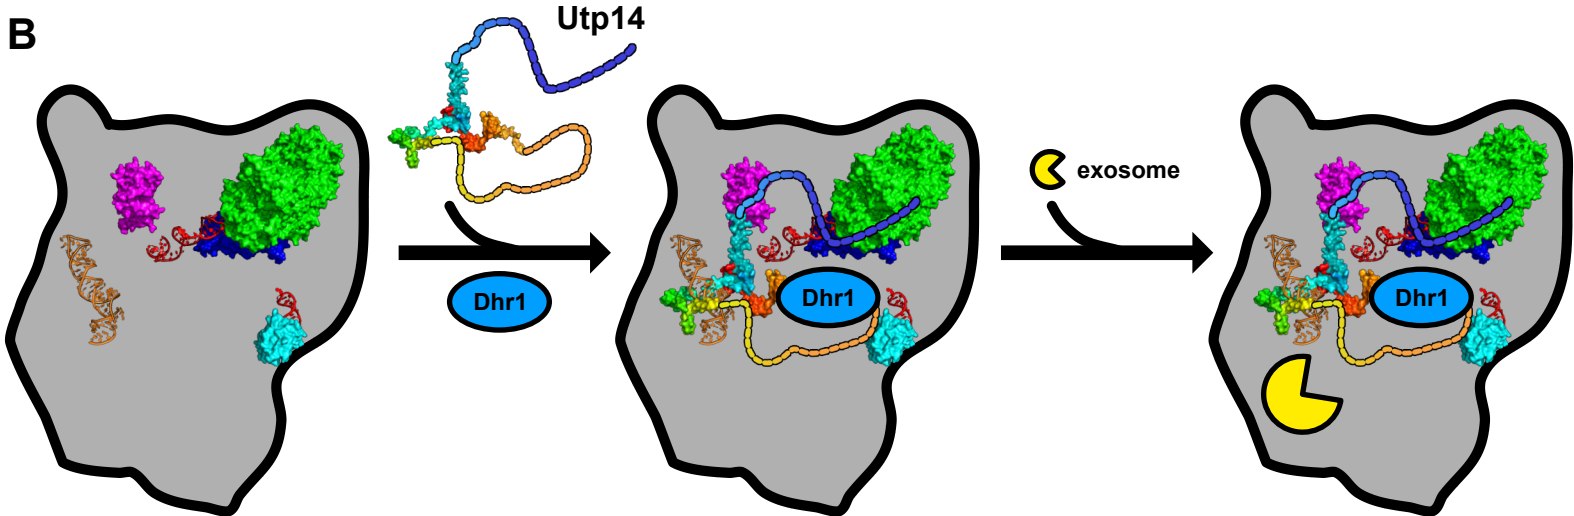

Figure 7, Black et al, 2018
